# Effects of the maternal and fetal proteome on birth weight: a Mendelian randomization analysis

Nancy McBride<sup>\*1,2</sup>, Alba Fernández-Sanlés<sup>1,3</sup>, Marwa Al Arab<sup>2</sup>, Tom A. Bond<sup>1,2,11</sup>, Jie Zheng<sup>5,6</sup>, Maria C. Magnus<sup>7</sup>, Elizabeth C. Corfield<sup>1,8,9</sup>, Gemma L Clayton<sup>1,2</sup>, Liang-Dar Hwang<sup>11</sup>, Robin N. Beaumont<sup>10</sup>, David M. Evans<sup>1,4,11</sup>, Rachel M. Freathy<sup>10</sup>, Tom R. Gaunt<sup>1,2</sup>, Deborah A Lawlor<sup>1,2</sup>, Maria Carolina Borges<sup>1,2</sup>

<sup>1</sup>MRC Integrative Epidemiology Unit at the University of Bristol

<sup>2</sup>Population Health Science, Bristol Medical School, University of Bristol

<sup>3</sup>MRC Unit for Lifelong Health and Ageing, University College London

<sup>4</sup>Frazer Institute, University of Queensland, Brisbane, QLD, Australia

<sup>5</sup>Department of Endocrine and Metabolic Diseases, Shanghai Institute of Endocrine and Metabolic Diseases, Ruijin Hospital, Shanghai Jiao Tong University School of Medicine, Shanghai, 200025, China

<sup>6</sup>Shanghai National Clinical Research Center for Metabolic Diseases, Key Laboratory for Endocrine and Metabolic Diseases of the National Health Commission of the PR China, Shanghai Key Laboratory for Endocrine Tumor, State Key Laboratory of Medical Genomics, Ruijin Hospital, Shanghai Jiao Tong University School of Medicine, Shanghai, 200025, China

<sup>7</sup>Centre for Fertility and Health, Norwegian Institute of Public Health, Oslo, Norway

<sup>8</sup>Psychiatric Genetic Epidemiology Group, Research Department, Lovisenberg Diaconal Hospital, Oslo, Norway

<sup>9</sup>PsychGen Centre for Genetic Epidemiology and Mental Health, Norwegian Institute of Public Health, Oslo, Norway

<sup>10</sup>Department of Clinical and Biomedical Sciences, Faculty of Health and Life Sciences, University of Exeter, Exeter, UK

<sup>11</sup>Institute for Molecular Bioscience, The University of Queensland, Brisbane, QLD, Australia

\*Corresponding author

nancy.mcbride@bristol.ac.uk

# 1 **Abstract**

## 2 Background

3 Fetal growth is an important indicator of survival, regulated by maternal and fetal genetic and  
4 environmental factors. However, little is known about the underlying molecular mechanisms.  
5 Proteins play a major role in a wide range of biological processes and could provide key  
6 insights into maternal and fetal molecular mechanisms regulating fetal growth.

## 7 Method

8 We used intergenerational two-sample Mendelian randomization to explore the effects of  
9 1,139 maternal and fetal genetically-instrumented plasma proteins on birth weight. We used  
10 genome-wide association summary data from the Early Growth Genetics (EGG) consortium  
11 (n=406,063 with maternal and/or fetal genotype), with independent replication in the  
12 Norwegian Mother, Father and Child Cohort Study (MoBa; n=74,932 mothers and n=62,108  
13 offspring). Maternal and fetal data were adjusted for the correlation between fetal and  
14 maternal genotype, to distinguish their independent genetic effects.

## 15 Results

16 We found that higher genetically-predicted maternal levels of NEC1 increased birth weight  
17 (mean-difference: 12g (95% CI [6g, 18g]) per 1 standard deviation protein level) as did  
18 PRS57 (20g [10g, 31g]) and ULK3 (140g [81g, 199g]). Higher maternal levels of Galectin\_4  
19 decreased birth weight (-206g [-299g, -113g]). In contrast, in the offspring, higher  
20 genetically-predicted offspring levels of NEC1 decreased birth weight (-10g [-16g, -5g]),  
21 alongside sLeptin\_R (-8g [-12g, -4g]), and UBS3B (-78g [-116g, -41g]). Higher fetal levels of  
22 Galectin\_4 increased birth weight (174g [89g, 258g]). We replicated these results in MoBa,  
23 and found supportive evidence for shared causal variants from genetic colocalization  
24 analyses and protein-protein network associations.

## 25 Conclusions

26 We find strong evidence for causal effects, sometimes in opposing directions, of maternal  
27 and fetal genetically-instrumented proteins on birth weight. These provide new insights into  
28 maternal and fetal molecular mechanisms regulating fetal growth, involving glucose  
29 metabolism, energy balance, and vascular function that could be used to identify new  
30 intervention targets to reduce the risk of fetal growth disorders, and their associated adverse  
31 maternal and fetal outcomes.

32 Keywords: fetal growth, birth weight, proteomics, molecular mechanisms, Mendelian  
33 randomization, pregnancy, MoBa

34

## 35 Introduction

36 Birth weight is a valuable and widely used measure of fetal growth. Healthy fetal growth is  
37 essential to minimise adverse perinatal health outcomes, including miscarriage, stillbirth,  
38 preterm birth and associated neonatal and infant morbidity and mortality (1-7). Large-scale  
39 genome-wide association studies (GWAS) have revealed hundreds of genomic regions  
40 independently associated with birth weight (2, 3, 8-10). In addition, these GWAS have  
41 uncovered a complex interplay between maternal and fetal genomes (8, 9), in which some  
42 genetic variants have maternal or fetal-specific effects on birth weight, whereas other genetic  
43 variants have both maternal and fetal effects, sometimes in opposite directions. Despite  
44 these advances in mapping fetal and maternal genetic variants, understanding the molecular  
45 mechanisms underpinning fetal growth remains a challenge (6).

46 Proteins play a major role in a wide range of biological processes (11). They are essential for  
47 cellular growth and repair, and could provide key insights into maternal and fetal molecular  
48 mechanisms regulating fetal growth (10). Mendelian Randomization (MR) is a method which  
49 uses genetic variants associated with exposures as instrumental variables, to test the effect  
50 of those exposures on human traits and diseases. The method aims to mitigate causal  
51 effects being biased due to confounding and reverse causation that may explain  
52 conventional observational associations. Previous MR studies have established causality of  
53 maternal modifiable factors on offspring birth weight, including higher maternal adiposity and  
54 higher maternal circulating glucose levels on higher birth weight, and smoking and higher  
55 blood pressure on lower birth weight (12) (13, 14) (5) (15). They have also provided novel  
56 insights, such as a potential effect of higher maternal glutamine levels on higher birth weight  
57 (5) and metabolically favourable adiposity on lower birth weight (16). As such, MR and  
58 proteomics can be integrated to explore maternal and fetal proteins regulating fetal growth  
59 by using genetic variants associated with protein levels (i.e., protein quantitative trait loci -  
60 pQTL) as instrumental variables. As most drug targets are proteins, identifying the effects of  
61 maternal circulating proteins on birth weight could identify targets for drug development that  
62 might prevent fetal growth restriction and over-growth, and their associated adverse  
63 pregnancy and perinatal outcomes.

64 The aim of this study was to identify causal effects of maternal and fetal proteins on birth  
65 weight to highlight underlying molecular mechanisms. To achieve that, we used two-sample  
66 MR, in which large-scale GWAS of plasma proteomics and birth weight were combined to  
67 examine the causal effect of plasma proteins on offspring birth weight.

68

## 69 Methods

70 We performed a two-sample MR study to identify maternal and fetal effects of plasma  
 71 proteins on offspring birthweight, examining both maternal and fetal genetic effects  
 72 (n=406,063 with maternal and/or fetal genotype). For proteins passing multiple testing  
 73 correction (FDR p-value < 5%), we tested whether results replicated in an independent  
 74 sample (n=74,932 mothers and n=62,108 offspring) and investigated whether MR results  
 75 could be confounded by linkage disequilibrium using genetic colocalization. For proteins  
 76 which had discovery and replication evidence, and no evidence against colocalization, we  
 77 used protein network associations to examine plausible pathways through which they could  
 78 be influencing birth weight. **Figure 1** summarises the analytical workflow used in this paper.

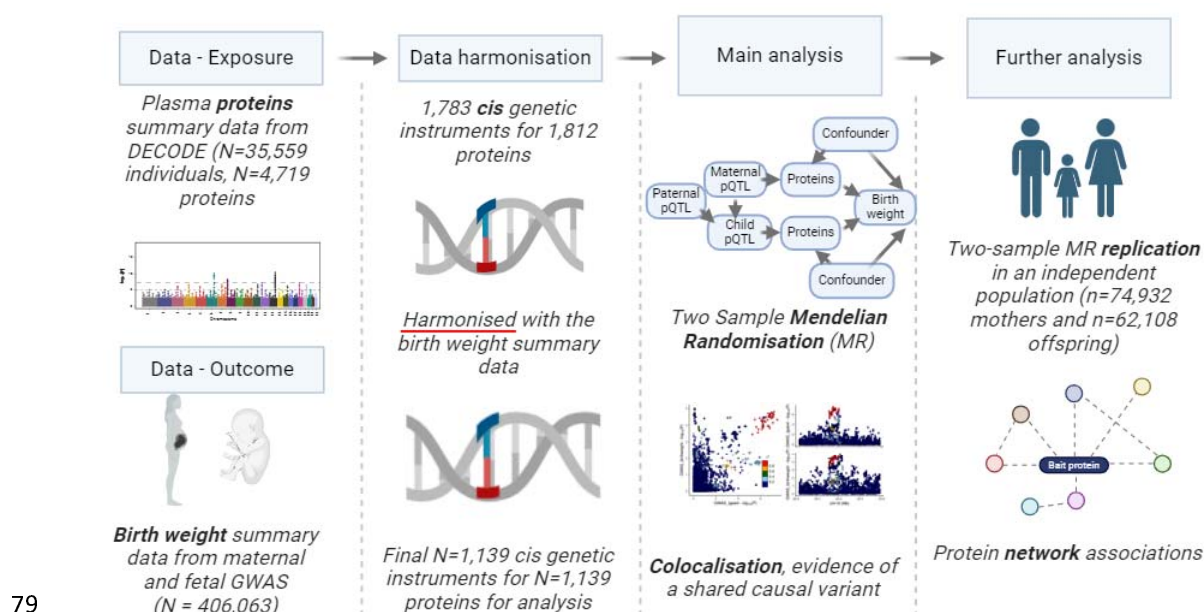

81 **Figure 1** – Schematic representation of the analyses conducted in this paper. Abbreviations:  
 82 GWAS, genome wide association studies; pQTL, protein quantitative trait loci

83

84 Selection of genetic instruments for plasma proteins

85 We selected genetic instruments from the deCODE GWAS of plasma proteins, which  
 86 provides data on 4,459 unique proteins, mapped to 13,514 pQTL. For our analyses, we  
 87 excluded trans instruments (N=2,647 proteins with 6,402 trans pQTL) and secondary  
 88 variants (N=5,238 secondary pQTL) retaining 1,783 cis pQTL defined as all those within  
 89  $\pm 1 \text{ Mb}$  for 1,812 proteins ( $P < 1 \times 10^{-7}$ ) (**Supplementary Figure 1**)

90 Discovery sample

91

92 We used publicly available meta-analysed GWAS summary data on birth weight. These data  
93 were obtained from the 2019 Early Growth Genetics (EGG) consortium plus UK Biobank  
94 (UKBB) GWAS. This GWAS has publicly available estimates of maternal genetic  
95 associations adjusted for fetal genotype and fetal genetic associations adjusted for maternal  
96 genotype (see below 'Adjustment for maternal/offspring genotype').

97 The following exclusions were made prior to running the GWAS: i) twins and other multiple  
98 births, ii) offspring born earlier than 37 weeks of gestation, iii) extreme birth weight outliers  
99 (only individuals born between 2.2kg and 4.6kg were included in the maternal GWAS, and  
100 individuals born between 2.5 and 4.5kg were included in the offspring GWAS) and iv) babies  
101 born with congenital anomalies (for the maternal genotype only). Genetic associations with  
102 birth weight were reported by the GWAS in standard deviation (SD) units. We multiplied  
103 these by 551.36 (the SD of birth weight in the UKB) to obtain results in grams (g).

104 Overall, N=406,063 participants contributed to the models estimating the maternal and fetal  
105 genetic effects on birth weight that were adjusted, respectively, for fetal and maternal  
106 genotype. These included N=101,541 participants who reported their own birth weight and  
107 birth weight of their first child, N=195,815 participants with their own birth weight (fetal  
108 GWAS), and N=108,707 female participants with data on offspring birth weight (maternal  
109 GWAS)(8) (17).

110 Replication study

111

112 For independent replication, we used genetic association data for birth weight from MoBa, a  
113 population-based pregnancy cohort study conducted by the Norwegian Institute of Public  
114 Health. Pregnant women and their partners were recruited from all over Norway from 1999-  
115 2008. The women consented to participate in 41% of the pregnancies. The cohort includes  
116 approximately N=114,500 children, N=95,200 mothers, and N=75,200 fathers (18). The  
117 current study uses version 12 of the quality-assured genetic data files released for research  
118 in January 2019. Birthweight was obtained from linked clinical records held in Medical Birth  
119 Registry of Norway (MBRN, a national health registry established in 1967 that contains  
120 information about all births in Norway, which is linked to the MoBa study using unique  
121 personal identification numbers). Questionnaire responses from mothers and fathers data  
122 were used to identify sex registered at birth, year of birth, birth weight, and multiple births  
123 (only available in the offspring). As in the discovery GWAS, multiple births and extremes of  
124 birth weight were excluded. Analyses were adjusted for principal components (PCs) and  
125 genotyping batch.

126 In MoBa, plasma blood samples were obtained from both parents during pregnancy, and  
127 from umbilical cord at birth (19). This project used MoBa genetic data that was quality  
128 controlled and imputed using the MoBaPsychGen pipeline, which has previously been  
129 described (20). Phasing and imputation were performed using the publicly available  
130 Haplotype Reference Consortium release 1.1 panel as a reference (21). The pipeline output  
131 consists of best-guess hard-call genotype data for 6,981,748 variants in 207,409 MoBa  
132 participants of European ancestry. GWAS in MoBa were run using *regenie* software (v 3.1.2)  
133 on the TSD server (22).

#### 134 Adjustment for maternal/offspring genotype

135

136 Birth weight is influenced by both maternal and fetal genotype. Therefore, to distinguish  
137 maternal and fetal genetic effects, in the discovery GWAS a weighted linear model was used  
138 to estimate maternal genetic associations (adjusted for fetal genotype), and fetal genetic  
139 associations adjusted for maternal genotype (3). From this, genetically-instrumented  
140 maternal effects of proteins on birth weight (not mediated or biased due to horizontal  
141 pleiotropy via fetal effects) and genetically instrumented fetal effects of proteins on birth  
142 weight (not confounded by maternal genotype) can be estimated. For our discovery sample  
143 (EGG+UKB GWAS), we downloaded these adjusted estimates from the GWAS consortium  
144 website. For our replication sample (MoBa), we estimated adjusted associations using the  
145 weighted linear model implemented via the DONUTS software package (51). As part of this,  
146 we used genetic covariance intercepts from LD score regression (LDSC) to account for  
147 overlap between maternal and fetal GWAS sample (23). The summary maternal adjusted for  
148 fetal, and fetal adjusted for maternal results were then used in our replication two-sample  
149 MR.

#### 150 Two sample MR

151

152 We conducted MR analyses to study the causal effects of circulating maternal and fetal  
153 proteins on birth weight. All MR analyses were performed using the *TwoSampleMR* R  
154 package version 0.5.6 (26). We used the Wald ratio estimator for analyses as only one pQTL  
155 was available per protein. Prior to MR analysis, genetic association data for proteins and  
156 birth weight were harmonized so that the effect of each genetic variant on the exposure and  
157 outcome were relative to the same effect allele. In some instances, data could not be  
158 harmonised (due to being palindromic SNPs, A/T or G/C, with allele frequencies close to  
159 50%), and these pQTL and their corresponding proteins were removed from further analyses  
160 (**Supplementary Table 2**). After excluding pQTL that failed harmonisation, we retained data  
161 for 1,139 proteins instrumented by the same number of *cis* pQTL (**Figure 1** and  
162 **Supplementary Figure 1**). We then analysed maternal and fetal data separately. MR results



163 with a FDR-adjusted p-value  $\leq 0.05$  were carried forward to the replication MR and  
164 subsequent analyses.

165 We sought replication of the discovery MR results using genetic association data for birth  
166 weight from MoBa participants. There is no overlap between the discovery and replication  
167 participants. The same procedures for data harmonisation and two-sample MR analyses  
168 described in the discovery stage were used in the replication analyses. To report MR results  
169 as the mean difference in birth weight (g) per 1 SD increase in protein level, we multiplied  
170 MR effect estimates and standard error by 565.63 (g), which corresponds to 1 SD of birth  
171 weight in MoBa. We then conducted a fixed effects meta-analysis of estimates from  
172 discovery and replication samples using the *meta* R package (version 6.5-0). Our criteria for  
173 replication were: i) directionally consistent results between discovery and replication, ii)  
174 associations with a p-value threshold  $< 0.05$  in the meta-analysis, as commonly used in  
175 GWAS, and reflecting the relatively modest size of the replication sample in comparison to  
176 the main analysis sample and (iii) there was no strong evidence supporting heterogeneity  
177 between discovery and replication MR estimates (Cochrane's Q p-value  $> 0.05$ ).

#### 178 Genetic colocalization

179  
180 We undertook genetic colocalization analyses using the *coloc* R package (24) to investigate  
181 whether our MR findings were compatible with a shared causal variant or confounded by  
182 linkage disequilibrium (LD) (24). This could happen if a selected pQTL is in LD with another  
183 genetic variant influencing birth weight via another biological mechanism. *Coloc* computes  
184 all possible configurations of causal variants for each of two traits and uses a Bayesian  
185 approach to calculate support for each causal model ( $H_0$ : no association;  $H_1$ : association  
186 with protein only;  $H_2$ : association with birth weight only;  $H_3$ : both traits owing to distinct  
187 causal variants;  $H_4$ : both traits owing to a shared causal variant). We restricted the analyses  
188 to a  $\pm 500$ kb window around the pQTL, and assumed a prior probability that any pQTL in the  
189 region is associated with the protein only ( $p_1$ ) of  $1 \times 10^{-4}$ , birth weight only ( $p_2$ ) of  $1 \times 10^{-4}$ , or  
190 both traits ( $p_{12}$ )  $1 \times 10^{-5}$ . We considered a posterior probability of association (PPA) for  $H_4 >$   
191  $0.70$  to provide strong evidence for colocalization, while a PPA for  $H_3 > 0.5$  was considered  
192 as evidence against colocalization. To facilitate visualisation of genomic signals in each  
193 region, we generated stacked recombination plots using the *locuscompareR* R package  
194 (<http://locuscompare.com/>) (25).

195 Where available, we extracted genetic association data for the genomic regions selected for  
196 colocalization analyses for plasma proteins and birth weight using the IEU Open GWAS  
197 (<https://gwas.mrcieu.ac.uk/>). The summary statistics for the genetic associations were  
198 downloaded from the deCODE website <https://www.decode.com/summarydata/>.



199 Fetal expression lookup  
200

201 One of the assumptions of MR is that the genetic instruments are statistically strongly  
202 associated with the phenotype in the population to which inference would be made (i.e. the  
203 relevance assumption). We were unable to determine whether our genetic instruments  
204 associated with fetal (in utero) circulating proteins, due to the absence of large-scale  
205 datasets with both offspring genetic data and cord-blood measures of circulating proteins.  
206 Instead, we explored whether the proteins with evidence from discovery and replication were  
207 expressed in fetal tissue. We used the single-cell transcriptomics data from the human cell  
208 atlas of fetal gene expression (26). The atlas was developed from 121 human fetal samples  
209 (post-conceptual age = 72-129 days) from 15 organs (eye, heart, intestine, kidney, liver,  
210 lung, muscle, pancreas, placenta, spleen, stomach, thymus, adrenal, cerebellum and  
211 cerebrum), profiling 4 million single cells using a sci-RNA-seq3 protocol. The authors used a  
212 clustering approach building on a form of principal components analysis (uniform manifold  
213 approximation and projection - UMAP) to generate a resource where fetal gene expression  
214 can be mapped across different organs, tissues and cell types  
215 (<https://descartes.brotmanbaty.org/>). We used this resource to check that our proteins of  
216 interest were expressed in fetal tissue, as a further line of evidence.

217

218 Protein networks

219 We explored information on protein-protein associations (referred to as interactions in  
220 genetic research) from the STRING database (<https://string-db.org/cgi>) to gain insights into  
221 presumed biological processes underlying our findings. STRING collates information from all  
222 known protein-protein interactions databases and provides a visual network of predicted  
223 associations for a particular group of proteins, whereby the proteins are represented as  
224 'nodes' and the lines which join them are the predicted functional associations. The colour of  
225 the line denotes the source of the interaction information (see figure legend) (27). We set the  
226 confidence score of a given association to be 'high confidence' and restricted to associations  
227 from curated databases (either KEGG, Reactome, BioCyc and Gene Ontology, as well as  
228 legacy datasets from PID and BioCarta), experimentally determined (where evidence comes  
229 from lab experiments), reported from gene fusions (from reported gene fusion events), gene  
230 co-occurrence (where gene families have similar occurrence patterns across genomes), co-  
231 expression (where gene are shown to be correlated in expression across a large number of  
232 datasets) and protein homology (where proteins may have similar structures).

233

## 234 Results

235 Identifying causal effects of maternal circulating proteins on offspring birth weight

236

237 We found evidence of causal effects of 5 maternal proteins (instrumented by 5 cis-pQTLs)  
238 on offspring birth weight that passed our 5% false discovery rate (FDR) adjusted p-value  
239 **(Figure 2)**. We found evidence that higher NEC1 increased birth weight (mean-difference:  
240 12g (95% CI: 6g, 18g) per 1 standard deviation protein level) as did PRS57 (20g (10g, 31g))  
241 and ULK3 (140g (81g, 199g)). Higher maternal levels of Galectin\_4 decreased birth weight (-  
242 206g (-299g, -113g)), as did PTN9 (-159g (-237g, -82g)). **(Figure 2)**.

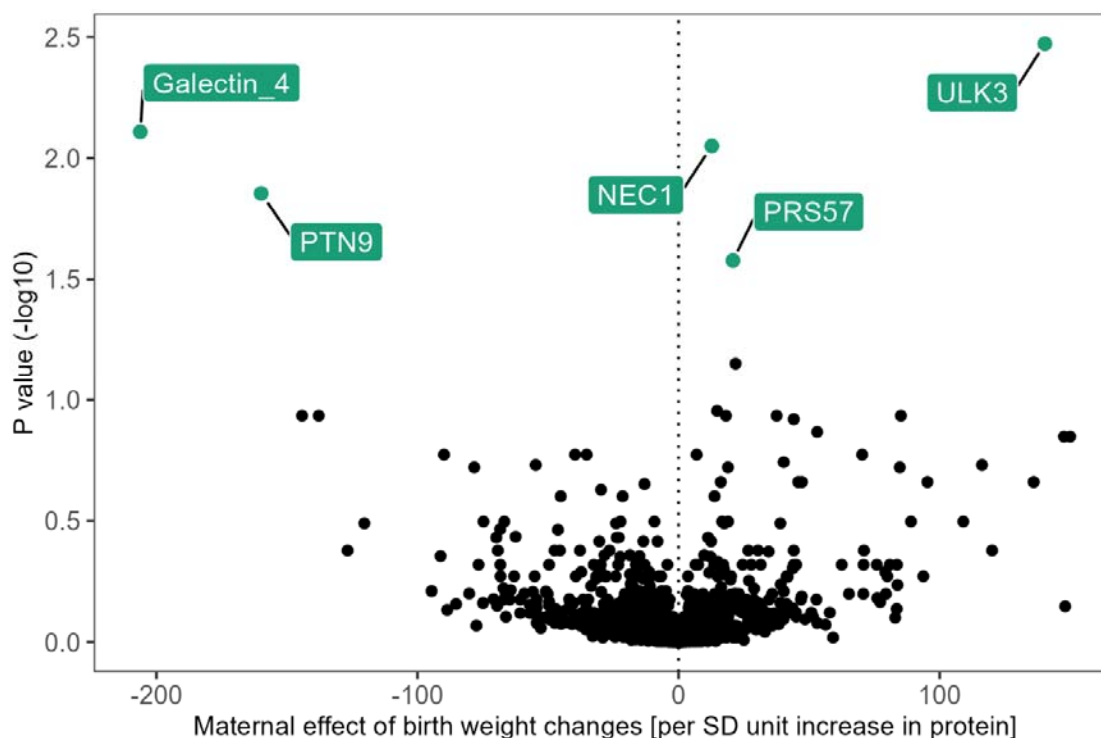

243

244 **Figure 2** – Two sample MR results using maternal cis pQTLs against offspring birth weight.  
245 FDR corrected p-values transformed to their  $-\log_{10}$ . Results plotted in green passed 5%  
246 FDR corrected p-value threshold. Abbreviations: SD, standard deviation

247

248 MR results for maternal proteins NEC\_1, Galectin\_4, ULK3 and PTN9 identified in discovery  
249 analyses met our replication criteria based on meta-analysed results from pooled discovery  
250 and replication. However, the replication result for PRS57 was not directionally consistent  
251 and there was evidence of high heterogeneity in the meta-analysis for PRS57, ULK3, PTN9  
252 **(Figure 3 and Supplementary Table 6 and 8)**.

253

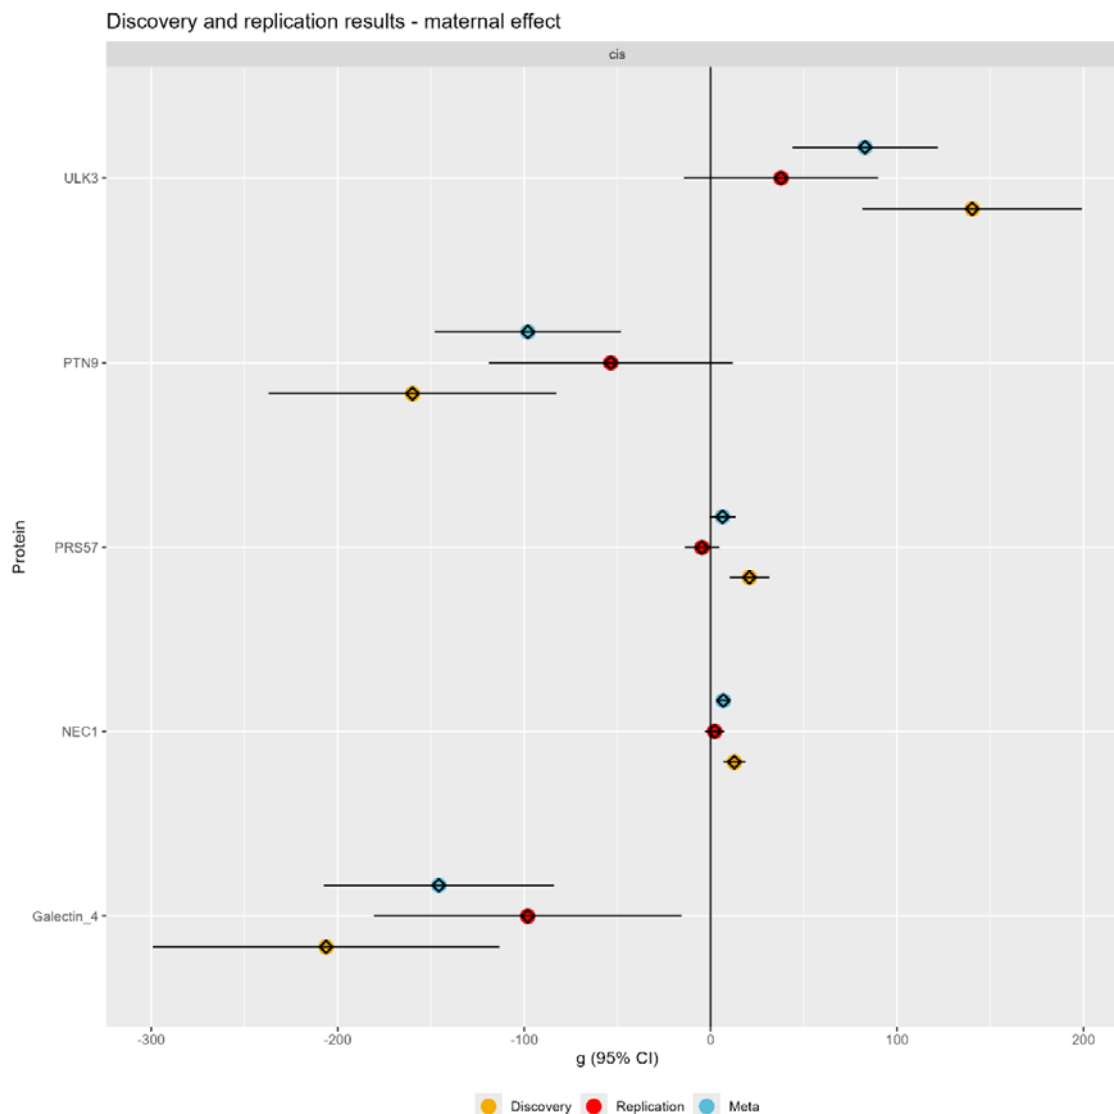

254

255 **Figure 3** Mendelian randomization results estimating the effect of genetically instrumented  
256 maternal proteins (in standard deviation units) on offspring birth weight (in grams) in the  
257 discovery (orange dots N=210,248 mothers), replication (red dots; N=87,651 mothers) and  
258 meta-analysed discovery and replication data. Replication was tested for proteins passing  
259 FDR-corrected p-value <0.05 in the discovery data. Our criteria for replication were: i)  
260 directionally consistent results between discovery and replication, ii) associations with a p-  
261 value threshold <0.05 in the meta-analysis, as commonly used in GWAS, and reflecting the  
262 relatively modest size of the replication sample in comparison to the main analysis sample  
263 and (iii) there was no strong evidence supporting heterogeneity between discovery and  
264 replication MR estimates (Cochrane's Q p-value > 0.05).

265

266 For maternal effects, we undertook colocalization analysis for all proteins which passed our  
267 FDR-adjusted p-value in the discovery analysis. For colocalization analyses, results are  
268 shown in **Table 1** as posterior probabilities (PP) of no association ( $H_0$ ), association with  
269 protein only ( $H_1$ ), birth weight only ( $H_2$ ), both traits owing to distinct causal variants ( $H_3$ ), or

270 both traits owing to a shared causal variant ( $H_4$ ) (24). The colocalization analyses supported  
271 causal effects for maternal circulating NEC1, Galectin\_4 and PRS57 with offspring birth  
272 weight, with high  $H_4$  of 0.82, 0.84, and 0.76 respectively (**Table 1**). For PTN9 and ULK3,  
273 there was strong evidence that the association stemmed from distinct causal variants.

274 **Table 1** – Genetic colocalization results for maternal proteins with birth weight

| Protein    | $H_0$ | $H_1$ | $H_2$ | $H_3$ | $H_4$ |
|------------|-------|-------|-------|-------|-------|
| NEC1       | 0     | 0.05  | 0     | 0.13  | 0.82  |
| Galectin_4 | 0     | 0.06  | 0     | 0.10  | 0.84  |
| PTN9       | 0     | 0     | 0     | 0.99  | 0     |
| ULK3       | 0     | 0     | 0     | 0.93  | 0.06  |
| PRS57      | 0     | 0.21  | 0     | 0.03  | 0.76  |

275 Abbreviations – PP, posterior probabilities; H, hypothesis. Results are expressed as  
276 posterior probabilities (PP) of no association ( $H_0$ ), association with protein only ( $H_1$ ), birth  
277 weight only ( $H_2$ ), both traits owing to distinct causal variants ( $H_3$ ), or both traits owing to a  
278 shared causal variant ( $H_4$ ).

279 Maternal discovery and replication MR, and colocalization results of are summarised in  
280 **Table 2**. Together these provide strong evidence for maternal circulating proteins Galectin\_4  
281 and NEC1 being identified in discovery, replication, and not being biased due to confounded  
282 by LD ( $H_4$  0.84 and 0.82, respectively). There was statistical support for PRS57 in the  
283 discovery and colocalization analysis ( $H_4$  0.76), but not the replication. Whilst there was  
284 good replication for ULK3, colocalization results for ULK3 and PTN9 suggested results were  
285 being driven by distinct causal variants ( $H_3 > 0.9$ ).

286

287

288

289

290

291

292

293

294

295 **Table 2** – Summary of results from analyses exploring the effect of maternal proteins on  
 296 offspring birth weight

| Protein    | Uniprot ID | Discovery MR direction of effect | Independently replicated | Colocalization |
|------------|------------|----------------------------------|--------------------------|----------------|
| NEC1       | P29120     | +                                | Yes                      | Yes            |
| Galectin_4 | P56470     | -                                | Yes                      | Yes            |
| PTN9       | Q99952     | -                                | Yes                      | No             |
| ULK3       | Q6PHR2     | +                                | Yes                      | No             |
| PRS57      | Q6UWY2     | +                                | No                       | Yes            |

297

298 Identifying causal effects of fetal circulating proteins on offspring birth weight

299

300 We found evidence of causal effects of 14 proteins on offspring birth weight. Higher  
 301 genetically-predicted offspring levels of NEC1 decreased birth weight (-10g (-16g, -5g),  
 302 alongside sLeptin\_R (-8g (-12g, -4g)), UBS3B (-78g (-116g, -41g)), FUT5 (-19g (-29g, -9g)),  
 303 IFN\_a\_b\_R1 (-53g (-84g, -23g)), TWEAK (-24g, (-37g, -11g)) and MK13 (-69g (-108g, -  
 304 30g)). Higher fetal levels of Galectin\_4 increased birth weight (174g (89g, 258g)), alongside  
 305 ACADV (227g (142g, 311g)), PLCG1 (133g (72g, 193g)), BCMA (61g (27g, 96g)) Cystatin C  
 306 (37g (16g, 58g), and FKB1B (46g (26g, 67g)) (**Figure 4**).

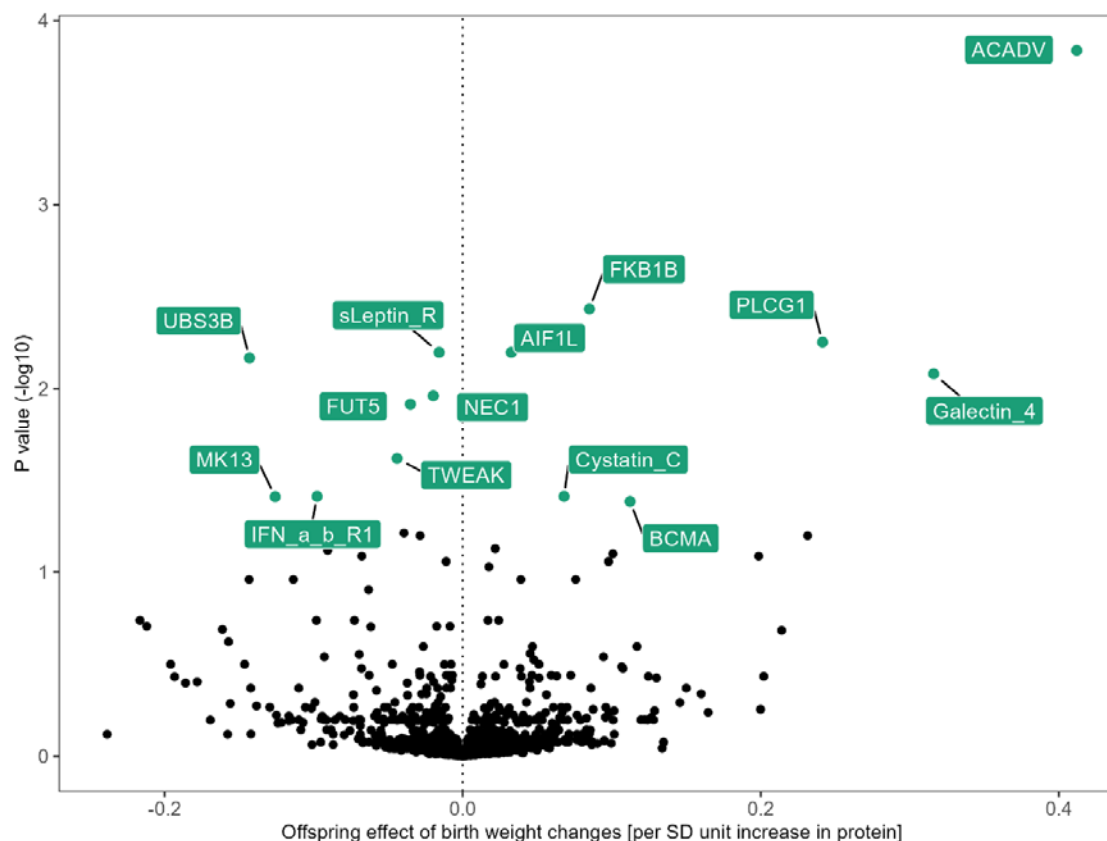

307

308 **Figure 4** – Fetal two sample MR results for cis pQTL. FDR corrected p-values transformed  
309 to their  $-\log_{10}$ . Results plotted in green passed FDR corrected p-value threshold.  
310 Abbreviations: SD, standard deviation

311

312 As in the maternal effects analysis, we conducted replication in MoBa and then ran a meta-  
313 analysis. We found meta-analysed MR results consistent with discovery for NEC1,  
314 Galectin\_4, sLeptin\_R, TWEAK, ACADV, UBS3B, BCMA (same direction of effect and with a  
315 meta-analysed FDR adjusted pvalue  $<0.05$  and no evidence of between discovery and  
316 replication results heterogeneity). PLCG1, MK13, FUT5, FKB1B, and Cystatin\_c did not  
317 replicate, and the replication sample estimate had the opposite direction of effect to the  
318 discovery sample (**Figure 5** and **Supplementary Table 7**). The pQTL for protein  
319 IFN\_a\_b\_R1 was not in our replication data so could not be tested or meta-analysed  
320 (**Supplementary Table 9**).

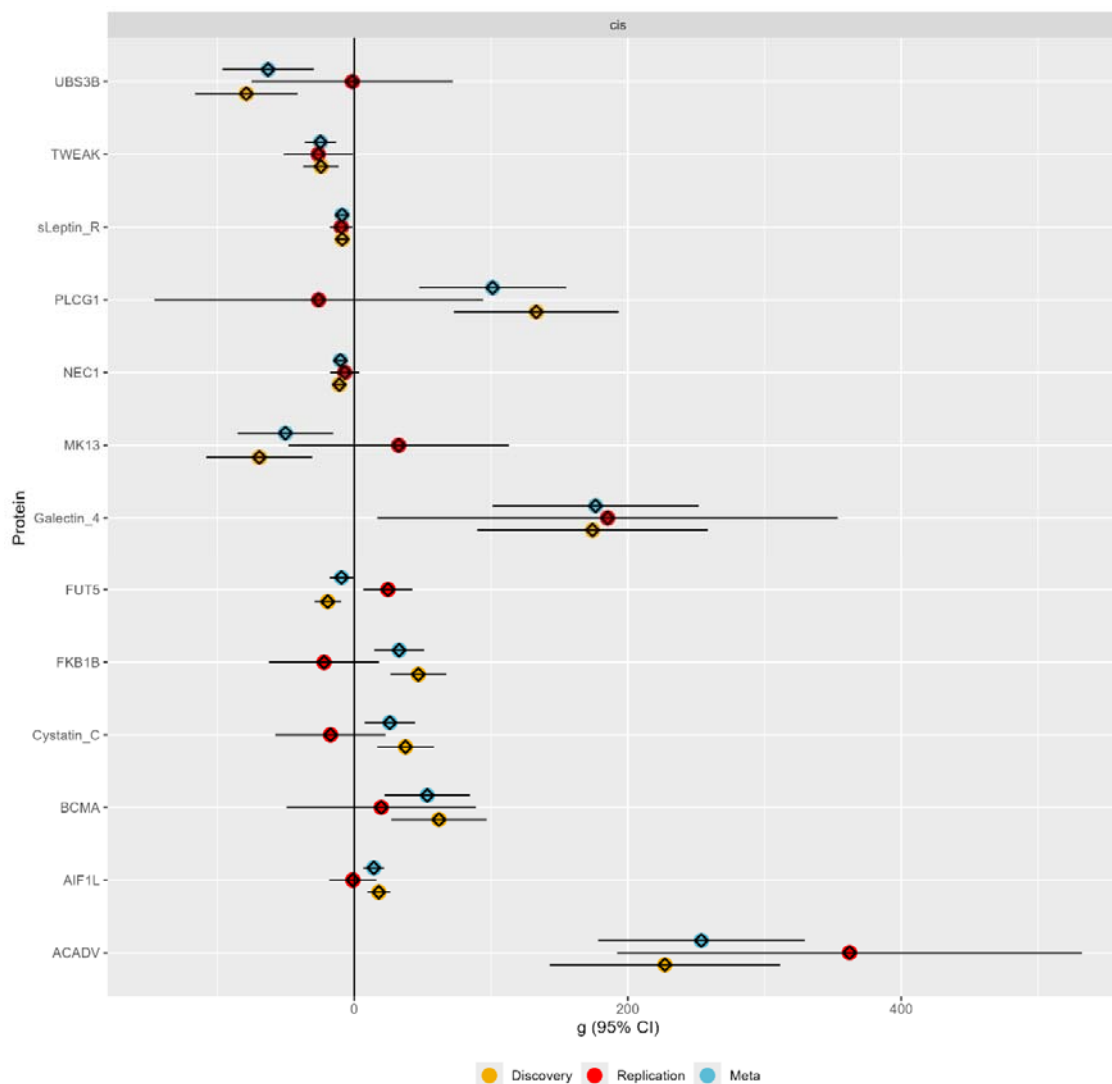

321

322 **Figure 5** Mendelian randomization analyses estimating the effect of genetically-instrumented  
 323 fetal proteins (in standard deviation units) on offspring birth weight (in grams) in the  
 324 discovery (N=297,356 offspring, orange dots), replication (N=62,108 offspring, red dots) and  
 325 meta-analyses (blue dots) of discovery and replication samples. Replication was tested for  
 326 proteins passing FDR-corrected p-value <0.05 in the discovery data. Our criteria for  
 327 replication were: i) directionally consistent results between discovery and replication, ii)  
 328 associations with a p-value threshold <0.05 in the meta-analysis, as commonly used in  
 329 GWAS, and reflecting the relatively modest size of the replication sample in comparison to  
 330 the main analysis sample and (iii) there was no strong evidence supporting heterogeneity  
 331 between discovery and replication MR estimates (Cochrane's Q p-value > 0.05).

332

333 For fetal effects, we undertook colocalization analysis for all proteins which passed our FDR  
 334 adjusted p-value in the discovery analysis. There was strong evidence of colocalization for  
 335 NEC1, ACADV, PLCG1, FUT5, IFN\_a\_b\_R1, AIF1L and UBS3B (all  $H_4 > 0.75$ ). There was  
 336 moderate evidence of colocalization for sLeptin\_R ( $H_4$  0.65). There was evidence that the  
 337 MR results for fetal Galectin\_4, Cystatin-C, BCMA and MK13 might be explained by LD  
 338 confounding ( $H_3 > 0.5$  or high  $H_1$ ) (**Table 3**).

339 **Table 3** – Genetic colocalization results for offspring proteins with birth weight.

| Protein    | H <sub>0</sub> | H <sub>1</sub> | H <sub>2</sub> | H <sub>3</sub> | H <sub>4</sub> |
|------------|----------------|----------------|----------------|----------------|----------------|
| NEC1       | 0              | 0.14           | 0              | 0.09           | 0.77           |
| Galectin_4 | 0              | 0.07           | 0              | 0.57           | 0.35           |
| ACADV      | 0              | 0              | 0              | 0.16           | 0.83           |
| CystatinC  | 0              | 0.42           | 0              | 0.08           | 0.49           |
| BCMA       | 0              | 0.45           | 0              | 0.09           | 0.45           |
| TWEAK      | 0              | 0              | 0.6            | 0.37           | 0              |
| FUT5       | 0              | 0.09           | 0              | 0.01           | 0.88           |
| FKB1B      | 0              | 0              | 0              | 0.99           | 0              |
| PLCG1      | 0              | 0.03           | 0              | 0.09           | 0.86           |
| MK13       | 0              | 0.33           | 0              | 0.3            | 0.37           |
| IFN_a_b_R1 | 0              | 0.1            | 0              | 0              | 0.89           |
| AIF1L      | 0              | 0.07           | 0              | 0              | 0.93           |
| UBS3B      | 0              | 0.05           | 0              | 0.01           | 0.92           |
| sLeptin_R  | 0              | 0.03           | 0              | 0.3            | 0.65           |

340 Abbreviations – PP, posterior probabilities; H, hypothesis. Results are expressed as  
 341 posterior probabilities (PP) of no association (H<sub>0</sub>), association with protein only (H<sub>1</sub>), birth  
 342 weight only (H<sub>2</sub>), both traits owing to distinct causal variants (H<sub>3</sub>), or both traits owing to a  
 343 shared causal variant (H<sub>4</sub>).

344



345 Fetal discovery and replication MR, and colocalization results of are summarised in **Table 4**.  
346 Together these provide strong evidence for fetal circulating proteins.

347

| Protein    | Uniprot ID | Discovery MR direction of effect | Independently replicated | Colocalization |
|------------|------------|----------------------------------|--------------------------|----------------|
| NEC1       | P29120     | -                                | Yes                      | Yes            |
| Galectin_4 | O00214     | +                                | Yes                      | No             |
| ACADV      | P49748     | +                                | Yes                      | Yes            |
| CystatinC  | P01034     | +                                | No                       | No             |
| BCMA       | Q02223     | +                                | No                       | No             |
| TWEAK      | O43508     | -                                | Yes                      | No             |
| FUT5       | Q11128     | -                                | No                       | Yes            |
| FKB1B      | Q96AY3     | +                                | No                       | No             |
| PLCG1      | P19174     | +                                | No                       | Yes            |
| MK13       | Q92910     | -                                | No                       | No             |
| IFN_a_b_R1 | P14787     | -                                | NA                       | Yes            |
| AIF1L      | Q9H8A1     | +                                | No                       | Yes            |
| UBS3B      | Q8WUW0     | -                                | Yes                      | Yes            |
| sLeptin_R  | P48357     | -                                | Yes                      | Uncertain      |

348

349 Fetal expression lookup

350

351 As a sanity check of our fetal results, we were able to check whether these genes are  
352 expressed in fetal tissue using an atlas of human gene expression during development  
353 (<https://descartes.brotmanbaty.org/>). We wanted to see if tissue expression data supported  
354 expression of the proteins with evidence from discovery and replication or colocalization in  
355 fetal tissue. We found this was the case for genes encoding NEC1 (in pancreas), FUT5 (in  
356 lung and thymus), Galectin\_4, UBS3B, sLeptin\_R, AIF1L, PLCG1, IFN\_a\_b\_R1 and ACADV  
357 (all expression all across multiple tissues) (**Supplementary Figures 20-29**).

358 Protein networks of identified maternal and fetal proteins affecting birth weight

359 We undertook protein-protein association analyses for the proteins that replicated in the MR  
360 results, and had supporting colocalization results in either maternal (NEC1, Galectin\_4) or  
361 fetal analyses (NEC1, ACADV, UBSH3B).

362 We found evidence that NEC1 (proprotein convertase 1, the same enzyme as PCSK1, as in  
363 the **Figure 6B** below) associates with proteins regulating glucose homeostasis, such as

364 insulin (INS), and glucagon (GCG) - hormones produced by the pancreas to regulate blood  
365 sugar levels. NEC1 is a stimulator of INS (28, 29). It also associates with proteins regulating  
366 food intake, such as pro-opiomelanocortin (POMC) and ghrelin (GHRL) (28-31) (**Figure 6B**).  
367 UBS3B associated with EGFR (part of the epidermal growth factor family), CBL (critical for  
368 cell signalling pathways), and UBC (which helps regulate cell stress) (**Figure 6C**). ACADV  
369 had the largest network of associations, including many proteins associated with fatty acid  
370 metabolism (ACOX1, CPT2, and other proteins within the thiolase family (enzymes which  
371 break down fatty acids) ACAA1 and ACAA2) (**Figure 6A**). However, Galectin\_4 and PRS57  
372 had no protein networks which survived our criteria (high confidence, and from sources  
373 detailed in **Figure 6** footnote).

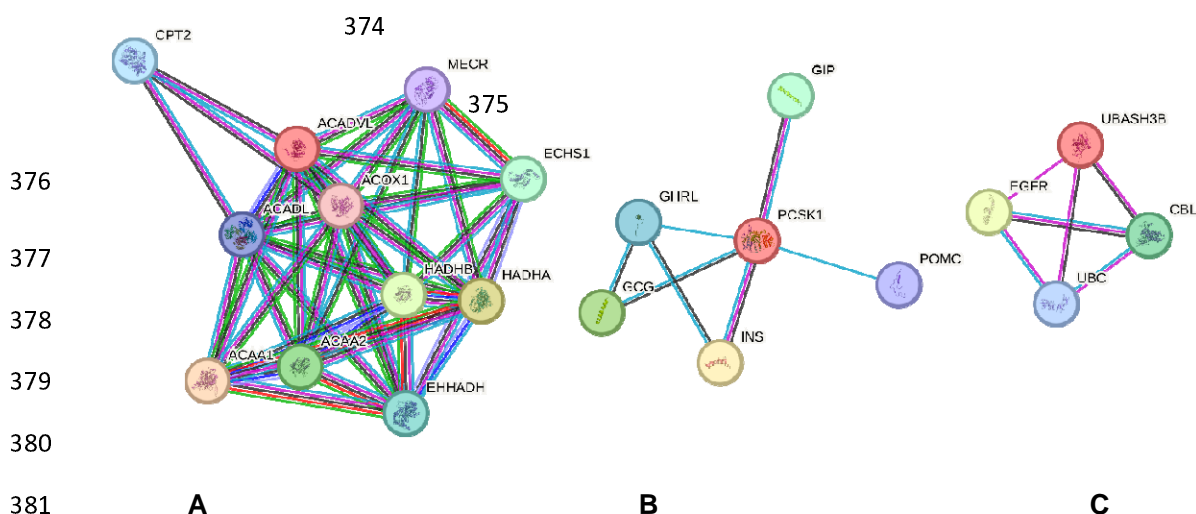

382 **Figure 6** - Protein-protein associations - proteins with evidence from both discovery,  
383 replication, and colocalization analyses. Different line colours represent different sources of  
384 evidence for these predictions – known associations from curated databases (light blue) and  
385 experimentally determined (pink); predicted associations from gene neighbourhood (green),  
386 gene fusions (red), gene co-occurrence (dark blue), co-expression, and protein homology  
387 (lilac). Associations are for proteins jointly contributing to a shared function, rather than  
388 specifically binding to each other. Splice isoforms or post-translational modifications are  
389 collapsed, i.e. each node represents all the proteins produced by a single, protein-coding  
390 gene locus. The physical distances between two nodes along an edge in a graph have no  
391 meaning.

## 392 Discussion

393 We have used two-sample MR to explore the causal effect of maternal pregnancy and fetal  
394 plasma proteins on offspring birth weight. We found evidence of potential causal effects,  
395 unlikely to be explained by chance or confounding by LD, for 2 maternal circulating proteins  
396 (NEC1, Galectin\_4) and 3 fetal circulating proteins (NEC1, ACADV, and UBS3B). For the  
397 remainder of the discussion, we focus mainly on these proteins which had the strongest  
398 evidence across all analyses.

399 Proteins with opposing maternal and fetal effects on birthweight

400 Two proteins, NEC1 and Galectin\_4, instrumented by cis-pQTLs, appear to be acting in  
401 opposite directions when comparing maternal and fetal MR results. They suggest that more  
402 NEC1 from the mother leads to higher birth weight, yet more NEC1 from the fetus leads to  
403 lower birth weight – as in the case with insulin and other regulators of fetal growth. This is  
404 consistent with previous work showing the role of NEC1 in regulating proinsulin processing  
405 (32). Indeed, a new drug (Setmelanotide) being tested to treat obesity is known to perturb  
406 PCSK1, because PCSK1 mutations lead to deficient signalling in melanocortin pathways  
407 (e.g. because of a lack of  $\alpha$ -MSH). Setmelanotide activates MC4R to restore appetite  
408 control, addressing genetic obesity caused by disrupted PCSK1 function (33). This is further  
409 evidence that our findings could represent molecular targets for birth weight. The STRING  
410 protein-protein associations in this study show this link between NEC1 and insulin (INS) and  
411 glucagon (GCG) (**Figure 6B**), demonstrating this known function in glucose homeostasis. It  
412 is important to note that whilst these protein-protein associations show co-expression (which  
413 may be downstream of a certain mechanism), they do not always imply interaction.  
414 Furthermore, the different sources of evidence are important when interpreting these  
415 interaction networks. We did not include text-mining and gene neighborhood interactions in  
416 the STRING networks so we could follow the most robust lines of evidence, and set a high  
417 confidence threshold. This may explain why we did not identify any associations for some  
418 proteins that replicated and were supported by colocalization, or because proteins like  
419 Galectin\_4 are poorly characterized (27).

420 In our analysis, Galectin\_4 was shown to the opposite direction of effect to NEC1 on birth  
421 weight. More Galectin\_4 from the mother leads to lower birthweight and more Galectin\_4  
422 from the fetus leads to higher birthweight. Galectin\_4 is part of the Galectin family which  
423 binds carbohydrates, lactose and sugars (34). Previous work has shown that the Galectin  
424 family of  $\beta$ -galactoside binding proteins are important in modulating diverse developmental  
425 processes. They contribute to placentation and regulate maternal immune tolerance (34) and  
426 have been previously suggested as biomarkers for adverse pregnancy outcomes like  
427 gestational diabetes (35) and infertility (34). Other expression studies have shown the  
428 importance of Galectins in pregnancy, and the importance of a maternal-fetal balancing act  
429 for ideal pregnancy outcomes. For example, lower levels of fetal expression of Galectins 3, 8  
430 and 9 have previously been associated with intrauterine growth restriction (34). However,  
431 most of the previous studies of plasma Galectin\_4 concentrations in pregnancy have come  
432 from mouse or in vitro models (35). It has not been well characterised either inside or outside  
433 of pregnancy, demonstrated by the lack of reported associations from the protein-protein

434 association models. Our study provides an additional line of evidence of a potential role of  
435 Galectin\_4 in fetal growth however there was a lack of colocalization in the fetal effects  
436 analysis (34).

437 PRS57 had strong evidence in the discovery and colocalization analyses for increasing birth  
438 weight, however it was the only protein in the maternal analyses which did not replicate.  
439 Whilst other members of the serine protease family (a large family of protein-cleaving  
440 enzymes) appear critical in pregnancy (e.g. high levels of other serine protease proteins are  
441 associated with preeclampsia (36)), to our knowledge, PRS57 has not been previously  
442 linked with birth weight, or other disorders of pregnancy. In contrast, PTN9 and ULK3 had  
443 evidence from discovery and replication, but not from colocalization. Unfortunately, we had  
444 limited power to explore further bias in MR results due to confounding by LD, but high  $H_3$   
445 results suggest this was down to the traits not sharing the same causal variant, although it  
446 could also be related to violations of coloc's assumptions due to multiple causal variants.

447 Proteins with fetal-specific effects on birthweight

448 UBS3B and ACADV had good evidence from discovery, replication, and colocalization. In  
449 our analysis, we found higher UBS3B lowered birth weight. UBS3B is a protein that is not yet  
450 well characterised for its role in pregnancy, but known to be associated with cellular  
451 processes for mammalian development (37). ACADV (very long-chain acyl-coenzyme A  
452 dehydrogenase, also known as VCLAD) catalyses the first step in beta-oxidation of long-  
453 chain fatty acids to release energy (38).

454 In our fetal analysis, we found evidence that higher fetal cis-pQTL instrumented sLeptin\_R  
455 reduced birth weight. sLeptin\_R has a well-established role in energy metabolism, body  
456 weight, and is secreted in fetal tissue and the placenta (39). The strong birth weight-  
457 associated locus near *CCNL1* from previous GWAS is also associated with leptin levels in  
458 adults, providing orthogonal evidence for a key role of this signalling pathway in fetal growth  
459 (40). There was good evidence for replication in our study, however the colocalization results  
460 fell slightly short of our threshold ( $H_4$  0.65, as opposed to 0.70).

461 Strengths and limitations

462 We have integrated the largest-scale proteomics and birthweight genetic association data to  
463 shed light on maternal and fetal molecular mechanisms regulating fetal growth. Furthermore,  
464 we have used large scale birth weight data from three large European cohorts (EGG, UK  
465 Biobank and MoBa) for our discovery, replication analyses and meta analyses. We have

466 undertaken sensitivity analyses, including checking for confounding by LD and attempted to  
467 further explain the underlying biology of our molecular findings.

468 In terms of limitations, our analysis has a limited coverage of the proteome due to the use of  
469 GWAS data on plasma proteins. For example, because they are not covered in existing  
470 proteomic GWAS, we were unable to assess the effects of two key placental expressed  
471 proteins - sFlt-1 and PlGF - , which have biological support for affecting fetal growth, and  
472 are now used clinically to predict risk of fetal growth restriction and pre-eclampsia in many  
473 countries (41-43). To explore effects of these and potentially other placental proteins we  
474 would need large proteomic GWAS of maternal pregnancy and cord-blood proteins. It is also  
475 likely that there are additional causal proteins that are not placental-/pregnancy-specific,  
476 which might be identified in future, where studies have access to even larger proteomics  
477 panels, or using cell- or tissue-specific proteomics.

478 Another potential limitation is related to epitope effects intrinsic to the proteomic technology.  
479 Whilst we aimed to reduce the likelihood of misclassification of protein levels through epitope  
480 effects (i.e. differences in antigen recognition, rather than protein levels) we cannot rule out  
481 some bias from these effects (44). We removed trans-pQTL and only retained cis-pQTL due  
482 to the higher possibility of bias due to pleiotropic mechanisms (45). For each protein we only  
483 had one SNP, so methods that have been developed to explore bias due to horizontal  
484 pleiotropy are not possible.

485 In using population level proteomics data, a further limitation is that in the exposure data,  
486 whilst we can assume in the maternal analysis that the offspring proteins won't affect the  
487 levels of the maternal proteins, in the offspring analysis, the assumption that maternal  
488 proteins won't affect offspring proteins may not hold. However, there is no way to directly  
489 test this.

490 Furthermore, we have assumed that genetic variants identified in protein GWAS conducted  
491 in males and non-pregnant women are similarly associated with circulating proteins in  
492 fetuses and pregnant women. Ideally, we would test this in studies that have GWAS data  
493 and circulating protein levels in women during pregnancy and cord-blood. However, such  
494 data is not currently available or only available in small numbers (for example, there is  
495 protein data profiled during pregnancy in the Born in Bradford (BiB) cohort, however the  
496 Olink coverage is fewer than 453 proteins in 4000 women, with none of these proteins  
497 overlapping with our top hits). However we found evidence that some of the proteins (i.e.  
498 NEC1, Galectin\_4) that our MR results suggest affect birth weight, are expressed in fetal  
499 tissue, which provides some support for their relevance to pregnancy and fetal intrauterine

500 mechanisms. Additionally, supporting evidence from other studies, where genetic variants  
501 are instrumental variables for social, behavioural, and molecular exposures during  
502 pregnancy, reveals consistent associations with those identified in GWAS of both women  
503 and men. This suggests that the assumption is unlikely to be violated. Significantly, with  
504 respect to this paper, we have previously demonstrated that among 89 associations  
505 involving genetic instruments for one or more of 9 amino acids, there was substantial  
506 consistency between those GWAS results derived in men and non-pregnant women, to  
507 outcomes in women only (46). This consistency was also observed in women who were  
508 pregnant at the time of amino acid measurement for 67 out of the 89 associations (75%). In  
509 the remaining 22 associations where heterogeneity was evident, it was likely attributed to the  
510 poor quality of genetic imputation for certain variants in the pregnancy study (46).

## 511 Conclusions

512 We found strong evidence for causal effects of several proteins on offspring birth weight  
513 across a range of analyses, highlighting proteins with opposing maternal and offspring  
514 effects (NEC1, Galectin\_4), and fetal (sLeptin\_R, UBS3B, ACADV) effects. These proteins  
515 are involved in multiple biological processes governing glucose homeostasis, energy  
516 metabolism, endothelial function and adipocyte differentiation. These findings provide new  
517 insights into maternal and fetal molecular mechanisms regulating fetal growth.

## 518 **Abbreviations**

519 EGG: Early Growth Genetics consortium

520 eQTL: expression quantitative trait loci

521 GWAS: genome-wide association study

522 LD: linkage disequilibrium

523 MoBa: Norwegian Mother, Father and Child Cohort Study

524 MR: Mendelian Randomisation

525 PP: predicted probability

526 pQTL: protein quantitative trait loci

527 SNP: single nucleotide polymorphism

528 UKBB: UK Biobank

## 529 **Declarations**

### 530 **Ethics approval and consent to participate**

531 All human research was approved by the relevant institutional review boards and conducted  
532 according to the Declaration of Helsinki. Participants of all studies in the Early Growth  
533 Genetics (EGG) consortium provided written informed consent. The UK Biobank has  
534 approval from the North West Multi-Centre Research Ethics Committee, which covers the  
535 United Kingdom. The establishment of the Norwegian Mother Father and Child (MoBa) birth  
536 cohort and initial data collection was based on a license from the Norwegian Data Protection  
537 Agency and approval from The Regional Committees for Medical and Health Research  
538 Ethics. The MoBa cohort is currently regulated by the Norwegian Health Registry Act. The  
539 current study was approved by The Regional Committees for Medical and Health Research  
540 Ethics (223273).

541 Consent for publication

542 NA

### 543 **Availability of data and materials**

#### 544 **Data availability**

545 Data on birth weight in our discovery analysis was contributed by the EGG Consortium using  
546 the UK Biobank Resource and was downloaded from [www.egg-consortium.org](http://www.egg-consortium.org). The  
547 genotype and phenotype data are available on application from the UK Biobank  
548 (<http://www.ukbiobank.ac.uk/>). Individual cohorts participating in the EGG Consortium should  
549 be contacted directly as each cohort has different data access policies. The exposure  
550 summary data from which genetic instruments were selected for pQTL are available from  
551 EpiGraphDB pQTL browser (<https://epigraphdb.org/pqtl>). Data from MoBa are available from  
552 the Norwegian Institute of Public Health after application to the MoBa Scientific Management  
553 Group (see its website [https://www.fhi.no/en/op/data-access-from-health-registries-health-  
554 studies-and-biobanks/data-access/applying-for-access-to-data/](https://www.fhi.no/en/op/data-access-from-health-registries-health-studies-and-biobanks/data-access/applying-for-access-to-data/) for details).

### 555 **Acknowledgments**

556 We gratefully acknowledge the participants in the studies, who were directly or indirectly  
557 participating, via consortia summary data, contributed to this research. We also are grateful  
558 to researchers who made their data open access. The Norwegian Mother, Father and Child



559 Cohort Study is supported by the Norwegian Ministry of Health and Care Services and the  
560 Ministry of Education and Research. We are grateful to all the participating families in  
561 Norway who take part in this on-going cohort study. We thank the Norwegian Institute of  
562 Public Health (NIPH) for generating high-quality genomic data. This research is part of the  
563 HARVEST collaboration, supported by the Research Council of Norway (#229624). We also  
564 thank the NORMENT Centre for providing genotype data, funded by the Research Council of  
565 Norway (#223273), South East Norway Health Authorities and Stiftelsen Kristian Gerhard  
566 Jebsen. We further thank the Center for Diabetes Research, the University of Bergen for  
567 providing genotype data and performing quality control and imputation of the data funded by  
568 the ERC AdG project SELECTIONPREDISPOSED, Stiftelsen Kristian Gerhard Jebsen, Trond  
569 Mohn Foundation, the Research Council of Norway, the Novo Nordisk Foundation, the  
570 University of Bergen, and the Western Norway Health Authorities. This work was carried out  
571 using the computational facilities of the Advanced Computing Research Centre, University of  
572 Bristol - <http://www.bristol.ac.uk/acrc/> and the TSD (Tjeneste for Sensitive Data) facilities,  
573 owned by the University of Oslo, operated and developed by the TSD service group at the  
574 University of Oslo, IT Department (USIT) ([tsd-drift@usit.uio.no](mailto:tsd-drift@usit.uio.no)). The computations on this  
575 platform were performed on resources provided by Sigma2 - the National Infrastructure for  
576 High-Performance Computing and Data Storage in Norway.

## 577 **Funding**

578 This work was supported by the University of Bristol and UK Medical Research Council (  
579 MC\_UU\_00032/05), the US National Institute for Health (R01 DK10324), the European  
580 Research Council via Advanced Grant 101021566, the British Heart Foundation  
581 (AA/18/7/34219 and CS/16/4/32482) and the National Institute of Health Research Bristol  
582 Biomedical Research Centre at University Hospitals Bristol NHS Foundation Trust and the  
583 University of Bristol.

584 RMF and RNB were funded by a Wellcome Trust and Royal Society Sir Henry Dale  
585 Fellowship (WT104150). RMF is supported by a Wellcome Senior Research Fellowship  
586 (WT220390). This research was supported by the National Institute for Health and Care  
587 Research Exeter Biomedical Research Centre. This research was funded in part by the  
588 Wellcome Trust [WT220390]. J.Z. is supported by grants from the National Key Research  
589 and Development Program of China (2022YFC2505203). MCB is funded by a University of  
590 Bristol Vice Chancellor's Fellowship. EC is supported by funding from the Research Council  
591 of Norway (#274611) and the South-Eastern Norway Regional Health Authority (#2021045).

592 The views expressed in this paper are those of the authors and not necessarily those of the  
593 any of the funders listed above.

594 For open access, the authors have applied a CC BY public copyright licence to any Author  
595 Accepted Manuscript version arising from this submission.

## 596 **Author contributions**

597 Study conception: DAL, MCB, RMF; Analysis: NM, MCB; Manuscript drafting: NM;  
598 Manuscript revisions: NM, MCB, DAL, AFS, MA, RB, RMF, TB, TRG, JZ, DE, DH, GC, EC,  
599 MM

## 600 **Conflict of interest**

601 The authors report no conflict of interest.

## 602 **Code availability**

603 All code is available on the GitHub repo <https://github.com/MRCIEU/MR-PREG>

## 604 **References**

- 605 1. Küpers LK, Monnereau C, Sharp GC, Yousefi P, Salas LA, Ghantous A, et al. Meta-analysis of  
606 epigenome-wide association studies in neonates reveals widespread differential DNA methylation  
607 associated with birthweight. *Nature Communications*. 2019;10(1):1893.
- 608 2. Leite DFB, Cecatti JG. Fetal Growth Restriction Prediction: How to Move beyond. *The*  
609 *Scientific World Journal*. 2019;2019:1519048.
- 610 3. Warrington NM, Freathy RM, Neale MC, Evans DM. Using structural equation modelling to  
611 jointly estimate maternal and fetal effects on birthweight in the UK Biobank. *International Journal of*  
612 *Epidemiology*. 2018;47(4):1229-41.
- 613 4. Wilcox AJ. On the importance—and the unimportance— of birthweight. *International*  
614 *Journal of Epidemiology*. 2001;30(6):1233-41.
- 615 5. Barry CA-O, Lawlor DA, Shapland CA-O, Sanderson E, Borges MA-O. Using Mendelian  
616 Randomisation to Prioritise Candidate Maternal Metabolic Traits Influencing Offspring Birthweight.  
617 LID - 10.3390/metabo12060537 [doi] LID - 537. (2218-1989 (Print)).
- 618 6. Bond TA, Karhunen V, Wielscher M, Auvinen J, Männikkö M, Keinänen-Kiukaanniemi S, et al.  
619 Exploring the role of genetic confounding in the association between maternal and offspring body  
620 mass index: evidence from three birth cohorts. *International Journal of Epidemiology*.  
621 2019;49(1):233-43.
- 622 7. Iliodromiti S, Mackay DF, Smith GCS, Pell JP, Sattar N, Lawlor DA, et al. Customised and  
623 Noncustomised Birth Weight Centiles and Prediction of Stillbirth and Infant Mortality and Morbidity:  
624 A Cohort Study of 979,912 Term Singleton Pregnancies in Scotland. *PLOS Medicine*.  
625 2017;14(1):e1002228.
- 626 8. Warrington NM, Beaumont RN, Horikoshi M, Day FR, Helgeland Ø, Laurin C, et al. Maternal  
627 and fetal genetic effects on birth weight and their relevance to cardio-metabolic risk factors. *Nature*  
628 *genetics*. 2019;51(5):804-14.

- 629 9. Beaumont RN, Warrington NM, Cavadino A, Tyrrell J, Nodzinski M, Horikoshi M, et al.  
630 Genome-wide association study of offspring birth weight in 86,577 women identifies five novel loci  
631 and highlights maternal genetic effects that are independent of fetal genetics. (1460-2083  
632 (Electronic)).
- 633 10. Ferkingstad E, Sulem P, Atlason BA, Sveinbjornsson G, Magnusson MI, Styrismiddottir EL, et al.  
634 Large-scale integration of the plasma proteome with genetics and disease. *Nature Genetics*.  
635 2021;53(12):1712-21.
- 636 11. Zheng J, Haberland V, Baird D, Walker V, Haycock PC, Hurle MR, et al. Phenome-wide  
637 Mendelian randomization mapping the influence of the plasma proteome on complex diseases.  
638 *Nature Genetics*. 2020;52(10):1122-31.
- 639 12. Zhang G, Bacelis J, Lengyel C, Teramo K, Hallman M, Helgeland Ø, et al. Assessing the Causal  
640 Relationship of Maternal Height on Birth Size and Gestational Age at Birth: A Mendelian  
641 Randomization Analysis. (1549-1676 (Electronic)).
- 642 13. Tyrrell J, Richmond RC, Palmer TM, Feenstra B, Rangarajan J, Metrustry S, et al. Genetic  
643 Evidence for Causal Relationships Between Maternal Obesity-Related Traits and Birth Weight. (1538-  
644 3598 (Electronic)).
- 645 14. Ardissino MA-O, Slob EA-O, Millar O, Reddy RA-OX, Lazzari L, Patel KHK, et al. Maternal  
646 Hypertension Increases Risk of Preeclampsia and Low Fetal Birthweight: Genetic Evidence From a  
647 Mendelian Randomization Study. (1524-4563 (Electronic)).
- 648 15. Brand JA-O, Gaillard RA-O, West JA-O, McEachan RA-O, Wright JA-O, Voerman E, et al.  
649 Associations of maternal quitting, reducing, and continuing smoking during pregnancy with  
650 longitudinal fetal growth: Findings from Mendelian randomization and parental negative control  
651 studies. (1549-1676 (Electronic)).
- 652 16. Thompson WA-O, Beaumont RA-O, Kuang AA-O, Warrington NA-OX, Ji Y, Tyrrell JA-O, et al.  
653 Higher maternal adiposity reduces offspring birthweight if associated with a metabolically  
654 favourable profile. (1432-0428 (Electronic)).
- 655 17. Allen NE, Sudlow C, Peakman T, Collins R, Biobank UK. UK biobank data: come and get it. *Sci*  
656 *Transl Med*. 6. United States 2014. p. 224ed4.
- 657 18. Haugan A, Birke C, Alsaker E, Høiseth G, Knudsen GP, Tambs K, et al. Cohort Profile Update:  
658 The Norwegian Mother and Child Cohort Study (MoBa). *International Journal of Epidemiology*.  
659 2016;45(2):382-8.
- 660 19. Paltiel L, Anita H, Skjerden T, Harbak K, Bækken S, Nina Kristin S, et al. The biobank of the  
661 Norwegian Mother and Child Cohort Study – present status. *Norsk Epidemiologi*. 2014;24(1-2).
- 662 20. Corfield EC, Frei O, Shadrin AA, Rahman Z, Lin A, Athanasiu L, et al. The Norwegian Mother,  
663 Father, and Child cohort study (MoBa) genotyping data resource: MoBaPsychGen pipeline v.1.  
664 *bioRxiv*. 2022:2022.06.23.496289.
- 665 21. McCarthy S, Das S, Kretzschmar W, Delaneau O, Wood AR, Teumer A, et al. A reference  
666 panel of 64,976 haplotypes for genotype imputation. *Nature Genetics*. 2016;48(10):1279-83.
- 667 22. Mbatchou J, Barnard L, Backman J, Marcketta A, Kosmicki JA, Ziyatdinov A, et al.  
668 Computationally efficient whole-genome regression for quantitative and binary traits. *Nature*  
669 *Genetics*. 2021;53(7):1097-103.
- 670 23. Bulik-Sullivan BK, Loh P-R, Finucane HK, Ripke S, Yang J, Patterson N, et al. LD Score  
671 regression distinguishes confounding from polygenicity in genome-wide association studies. *Nature*  
672 *Genetics*. 2015;47(3):291-5.
- 673 24. Wallace C. Statistical Testing of Shared Genetic Control for Potentially Related Traits. *Genetic*  
674 *Epidemiology*. 2013;37(8):802-13.
- 675 25. Liu B, Gludemans MJ, Rao AS, Ingelsson E, Montgomery SB. Abundant associations with  
676 gene expression complicate GWAS follow-up. *Nature Genetics*. 2019;51(5):768-9.
- 677 26. Cao J, O'Day DR, Pliner HA, Kingsley PD, Deng M, Daza RM, et al. A human cell atlas of fetal  
678 gene expression. *Science*. 2020;370(6518):eaba7721.

- 679 27. Szklarczyk D, Franceschini A, Wyder S, Forslund K, Heller D, Huerta-Cepas J, et al. STRING  
680 v10: protein–protein interaction networks, integrated over the tree of life. *Nucleic Acids Research*.  
681 2014;43(D1):D447-D52.
- 682 28. Benzinou M, Creemers Jw Fau - Choquet H, Choquet H Fau - Lobbens S, Lobbens S Fau - Dina  
683 C, Dina C Fau - Durand E, Durand E Fau - Guerardel A, et al. Common nonsynonymous variants in  
684 PCSK1 confer risk of obesity. (1546-1718 (Electronic)).
- 685 29. Stijnen P, Ramos-Molina B, O'Rahilly S, Creemers JWM. PCSK1 Mutations and Human  
686 Endocrinopathies: From Obesity to Gastrointestinal Disorders. *Endocrine Reviews*. 2016;37(4):347-  
687 71.
- 688 30. Wei X, Ma X, Lu R, Bai G, Zhang J, Deng R, et al. Genetic Variants in PCSK1 Gene Are  
689 Associated with the Risk of Coronary Artery Disease in Type 2 Diabetes in a Chinese Han Population:  
690 A Case Control Study. *PLOS ONE*. 2014;9(1):e87168.
- 691 31. Gjesing AP, Vestmar MA, Jørgensen T, Henri M, Holst JJ, Witte DR, et al. The Effect of PCSK1  
692 Variants on Waist, Waist-Hip Ratio and Glucose Metabolism Is Modified by Sex and Glucose  
693 Tolerance Status. *PLOS ONE*. 2011;6(9):e23907.
- 694 32. Nead KT, Li A, Wehner MR, Neupane B, Gustafsson S, Butterworth A, et al. Contribution of  
695 common non-synonymous variants in PCSK1 to body mass index variation and risk of obesity: a  
696 systematic review and meta-analysis with evidence from up to 331 175 individuals. (1460-2083  
697 (Electronic)).
- 698 33. Ryan DH. Next Generation Antiobesity Medications: Setmelanotide, Semaglutide, Tirzepatide  
699 and Bimagramab: What do They Mean for Clinical Practice? *J Obes Metab Syndr*. 2021;30(3):196-  
700 208.
- 701 34. Blois SM, Dveksler G, Vasta GR, Freitag N, Blanchard V, Barrientos G. Pregnancy  
702 Galectinology: Insights Into a Complex Network of Glycan Binding Proteins. (1664-3224 (Electronic)).
- 703 35. Schrader S, Unverdorben L, Hutter S, Knabl J, Schmoeckel E, Meister S, et al. Overexpression  
704 of galectin-4 in placentas of women with gestational diabetes. (1872-7603 (Electronic)).
- 705 36. Ajayi F, Kongoasa N, Gaffey T, Asmann YW, Watson WJ, Baldi A, et al. Elevated expression of  
706 serine protease HtrA1 in preeclampsia and its role in trophoblast cell migration and invasion. *Am J*  
707 *Obstet Gynecol*. 2008;199(5):557.e1-10.
- 708 37. Vukojević K, Šoljić V, Martinović V, Raguž F, Filipović N. The Ubiquitin-Associated and SH3  
709 Domain-Containing Proteins (UBASH3) Family in Mammalian Development and Immune Response.  
710 *Int J Mol Sci*. 2024;25(3).
- 711 38. Pena LD, van Calcar SC, Hansen J, Edick MJ, Walsh Vockley C, Leslie N, et al. Outcomes and  
712 genotype-phenotype correlations in 52 individuals with VLCAD deficiency diagnosed by NBS and  
713 enrolled in the IBEM-IS database. *Mol Genet Metab*. 2016;118(4):272-81.
- 714 39. Hoggard N, Hunter L, Duncan JS, Williams LM, Trayhurn P, Mercer JG. Leptin and leptin  
715 receptor mRNA and protein expression in the murine fetus and placenta. *Proceedings of*  
716 *the National Academy of Sciences*. 1997;94(20):11073-8.
- 717 40. Kilpeläinen TO, Carli JFM, Skowronski AA, Sun Q, Kriebel J, Feitosa MF, et al. Genome-wide  
718 meta-analysis uncovers novel loci influencing circulating leptin levels. *Nature Communications*.  
719 2016;7(1):10494.
- 720 41. Agrawal S, Cerdeira AS, Redman C, Vatish M. Meta-Analysis and Systematic Review to Assess  
721 the Role of Soluble FMS-Like Tyrosine Kinase-1 and Placenta Growth Factor Ratio in Prediction of  
722 Preeclampsia: The SaPPPhirE Study. (1524-4563 (Electronic)).
- 723 42. Andrikos AA-OX, Andrikos D, Schmidt B, Birdir C, Kimmig R, Gellhaus A, et al. Course of the  
724 sFlt-1/PlGF ratio in fetal growth restriction and correlation with biometric measurements, fetu-  
725 maternal Doppler parameters and time to delivery. (1432-0711 (Electronic)).
- 726 43. Chang Y-S, Chen C-N, Jeng S-F, Su Y-N, Chen C-Y, Chou H-C, et al. The sFlt-1/PlGF ratio as a  
727 predictor for poor pregnancy and neonatal outcomes. *Pediatrics & Neonatology*. 2017;58(6):529-33.
- 728 44. Suhre K, McCarthy MI, Schwenk JM. Genetics meets proteomics: perspectives for large  
729 population-based studies. *Nature Reviews Genetics*. 2021;22(1):19-37.

730 45. Fauman EB, Hyde C. An optimal variant to gene distance window derived from an empirical  
731 definition of cis and trans protein QTLs. BMC Bioinformatics. 2022;23(1):169.  
732 46. Zhao J, Stewart ID, Baird D, Mason D, Wright J, Zheng J, et al. Causal effects of maternal  
733 circulating amino acids on offspring birthweight: a Mendelian randomisation study. (2352-3964  
734 (Electronic)).

## 735 Supplementary

736

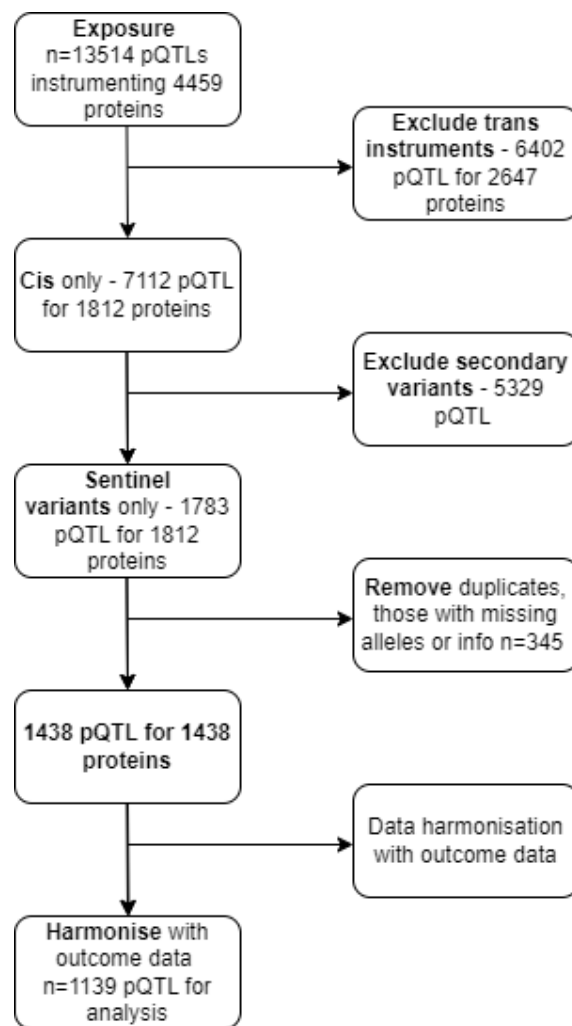

737

738

739 Supplementary figure 1 – a workflow of instruments (pQTL) used in our analysis.  
740 Abbreviations: pQTL, protein quantitative trait loci

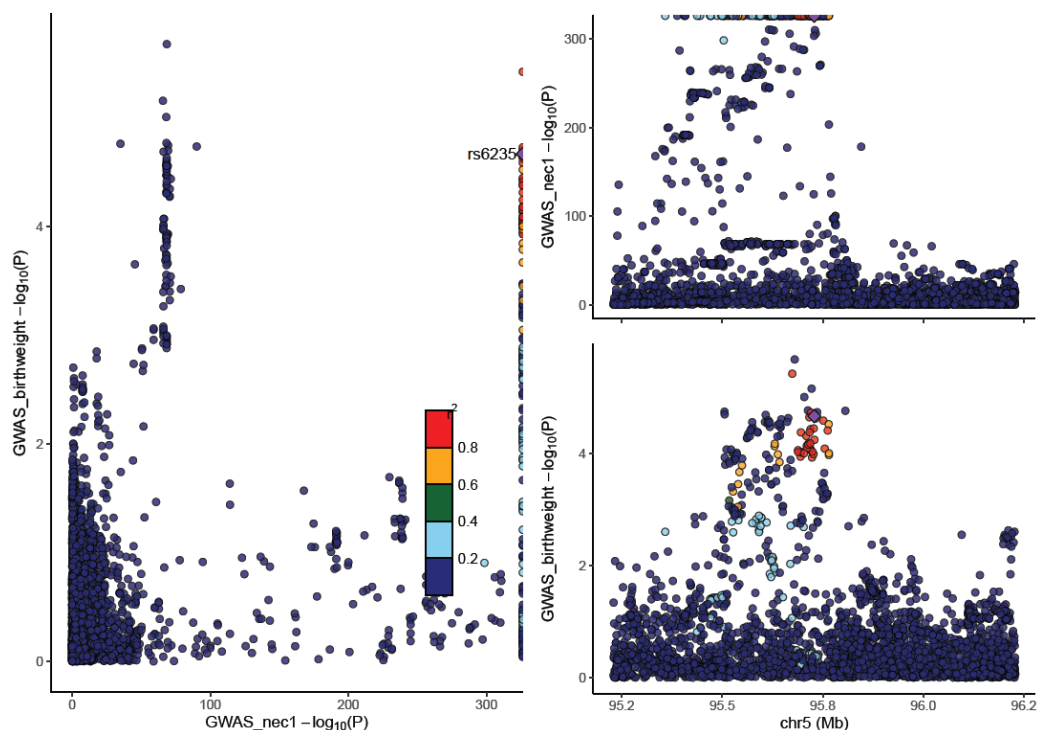

741

742 Supplementary figure 2 - Genetic associations with NEC1 and offspring birth weight  
743 in maternal analysis. Each data point represents one genetic variant. The purple  
744 diamond represents the selected pQTL. Colours indicate the  $R^2$  values for strength  
745 of linkage disequilibrium between the genetic variant and the pQTL. In the left panel,  
746 the plot shows the correlation between log 10 p-values for the genetic association  
747 with protein levels (x axis) and birth weight (y axis). The right panels show  
748 recombination plots for the protein (top panel) and birth weight (bottom panel) with  
749 log10 p-values in the y axis and chromosome positions in the x axis.

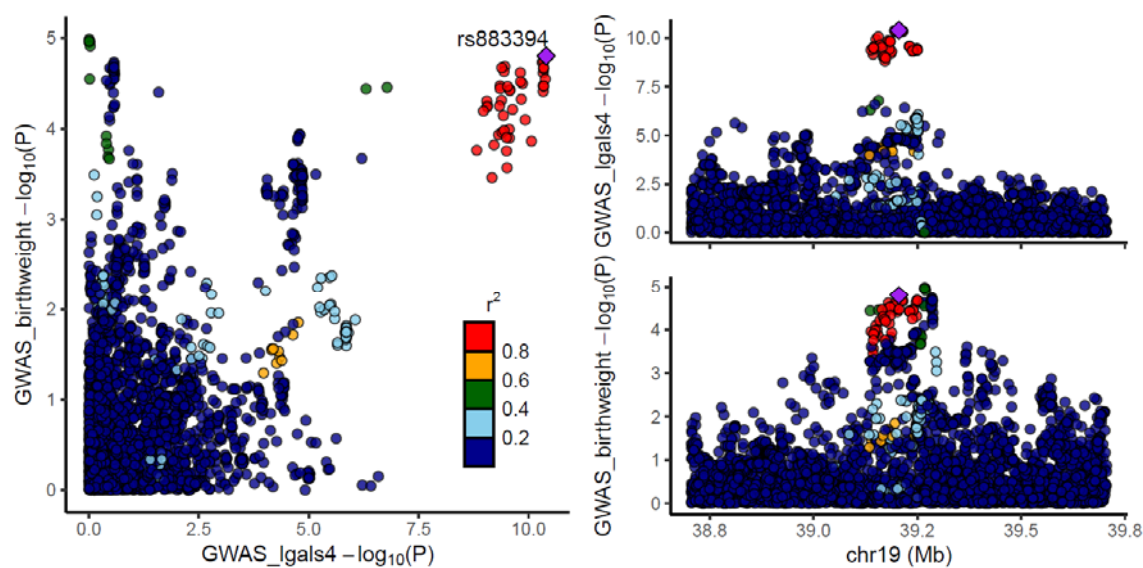

750

751 Supplementary figure 3 - Genetic associations with Galectin\_4 and offspring birth  
752 weight in maternal analysis. Each data point represents one genetic variant. The  
753 purple diamond represents the selected pQTL. Colours indicate the  $R^2$  values for

754 strength of linkage disequilibrium between the genetic variant and the pQTL. In the  
755 left panel, the plot shows the correlation between log 10 p-values for the genetic  
756 association with protein levels (x axis) and birth weight (y axis). The right panels  
757 show recombination plots for the protein (top panel) and birth weight (bottom panel)  
758 with log10 p-values in the y axis and chromosome positions in the x axis.

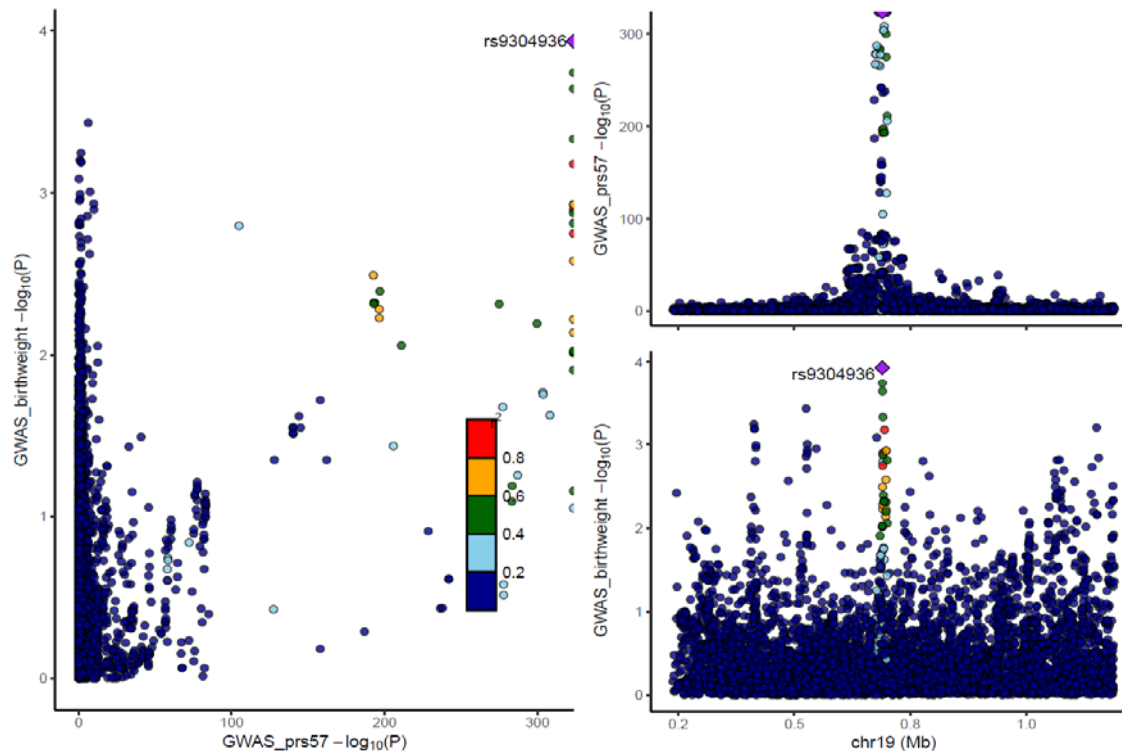

759

760 Supplementary figure 4 - Genetic associations with PRS57 and offspring birth weight  
761 in maternal analysis. Each data point represents one genetic variant. The purple  
762 diamond represents the selected pQTL. Colours indicate the  $R^2$  values for strength  
763 of linkage disequilibrium between the genetic variant and the pQTL. In the left panel,  
764 the plot shows the correlation between log 10 p-values for the genetic association  
765 with protein levels (x axis) and birth weight (y axis). The right panels show  
766 recombination plots for the protein (top panel) and birth weight (bottom panel) with  
767 log10 p-values in the y axis and chromosome positions in the x axis.



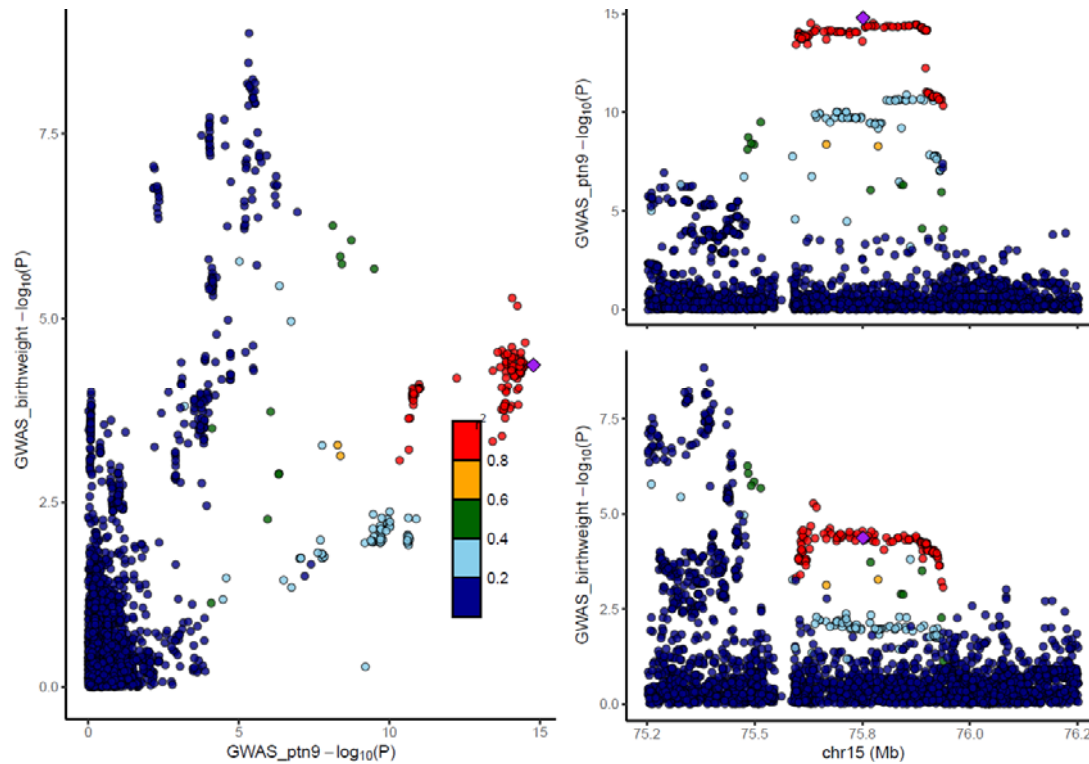

768

769 Supplementary figure 5 - Genetic associations with PTN9 and offspring birth weight  
770 in offspring analyses. Each data point represents one genetic variant. The purple  
771 diamond represents the selected pQTL. Colours indicate the  $R^2$  values for strength  
772 of linkage disequilibrium between the genetic variant and the pQTL. In the left panel,  
773 the plot shows the correlation between log 10 p-values for the genetic association  
774 with protein levels (x axis) and birth weight (y axis). The right panels show  
775 recombination plots for the protein (top panel) and birth weight (bottom panel) with  
776 log10 p-values in the y axis and chromosome positions in the x axis.

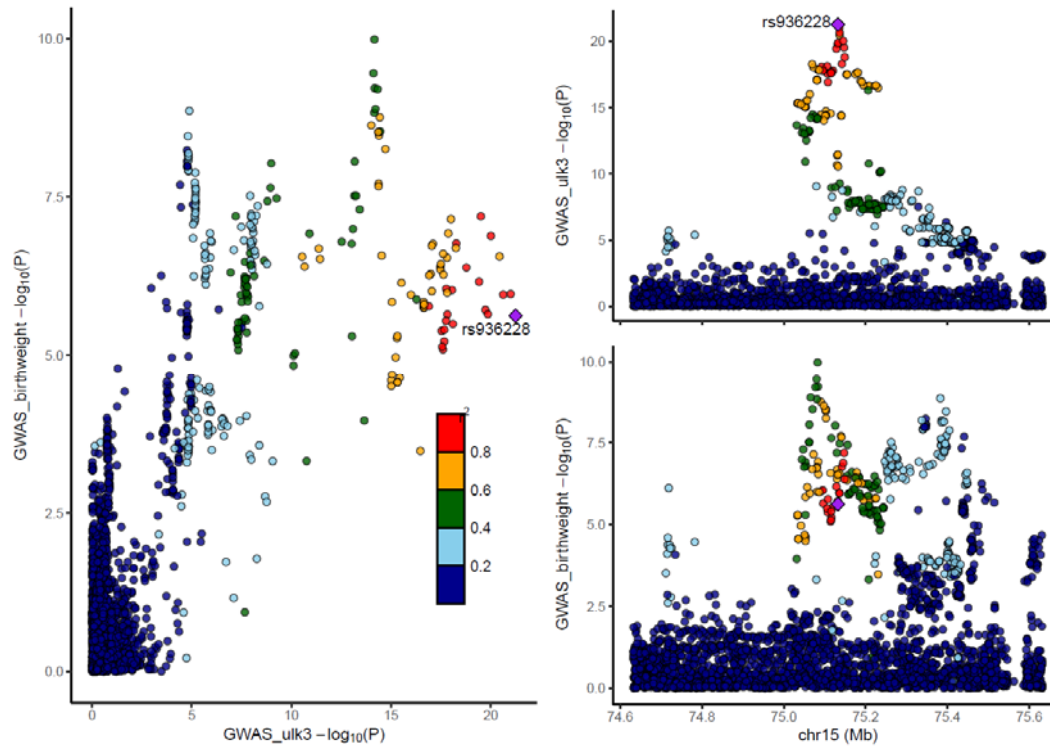

777

778 Supplementary figure 6 - Genetic associations with ULK3 and offspring birth weight  
779 in maternal analysis. Each data point represents one genetic variant. The purple  
780 diamond represents the selected pQTL. Colours indicate the  $R^2$  values for strength  
781 of linkage disequilibrium between the genetic variant and the pQTL. In the left panel,  
782 the plot shows the correlation between  $\log_{10}$  p-values for the genetic association  
783 with protein levels (x axis) and birth weight (y axis). The right panels show  
784 recombination plots for the protein (top panel) and birth weight (bottom panel) with  
785  $\log_{10}$  p-values in the y axis and chromosome positions in the x axis.

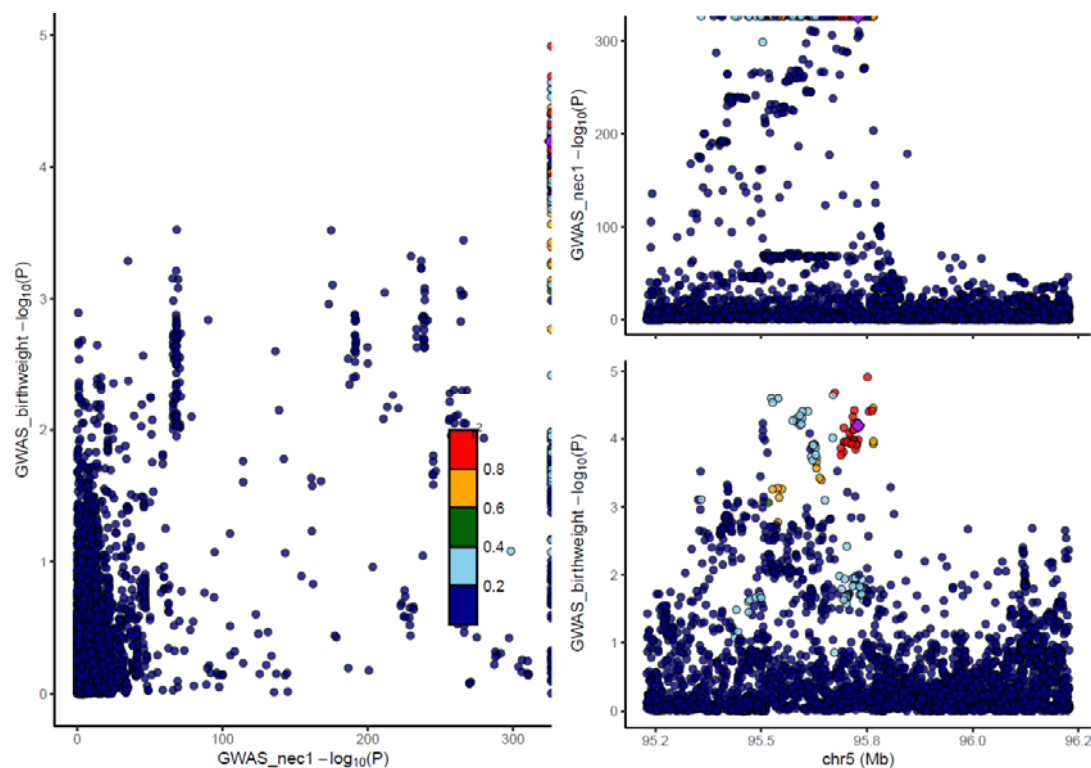

786

787 Supplementary figure 7 - Genetic associations with NEC1 and offspring birth weight  
788 in offspring analysis. Each data point represents one genetic variant. The purple  
789 diamond represents the selected pQTL. Colours indicate the  $R^2$  values for strength  
790 of linkage disequilibrium between the genetic variant and the pQTL. In the left panel,  
791 the plot shows the correlation between log 10 p-values for the genetic association  
792 with protein levels (x axis) and birth weight (y axis). The right panels show  
793 recombination plots for the protein (top panel) and birth weight (bottom panel) with  
794 log10 p-values in the y axis and chromosome positions in the x axis.

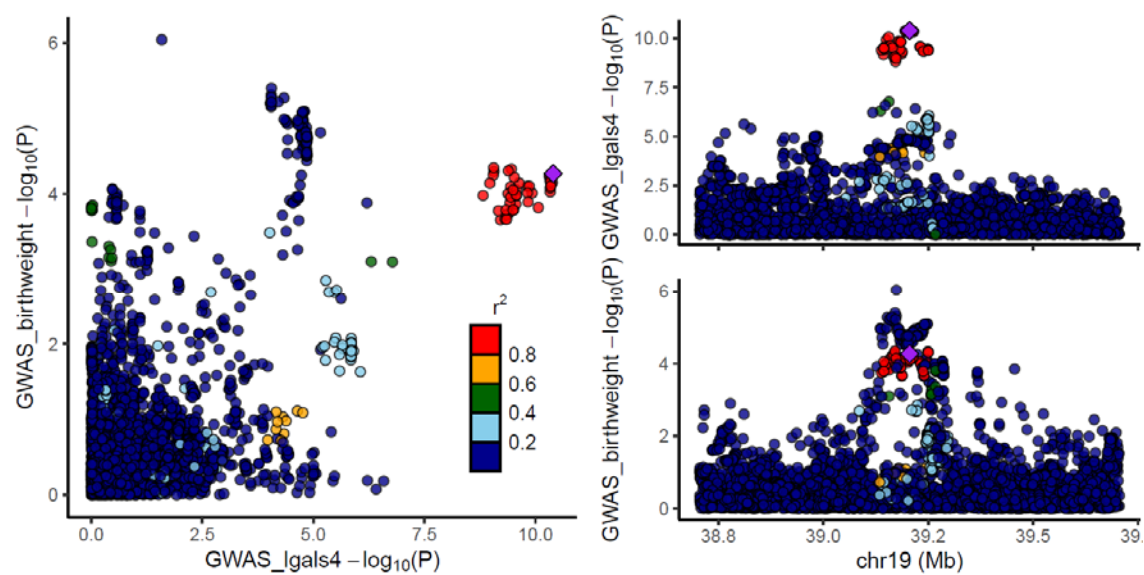

795

796 Supplementary figure 8 - Genetic associations with Galectin\_4 and offspring birth  
797 weight in offspring analysis. Each data point represents one genetic variant. The  
798 purple diamond represents the selected pQTL. Colours indicate the  $R^2$  values for  
799 strength of linkage disequilibrium between the genetic variant and the pQTL. In the  
800 left panel, the plot shows the correlation between log 10 p-values for the genetic  
801 association with protein levels (x axis) and birth weight (y axis). The right panels  
802 show recombination plots for the protein (top panel) and birth weight (bottom panel)  
803 with log10 p-values in the y axis and chromosome positions in the x axis.

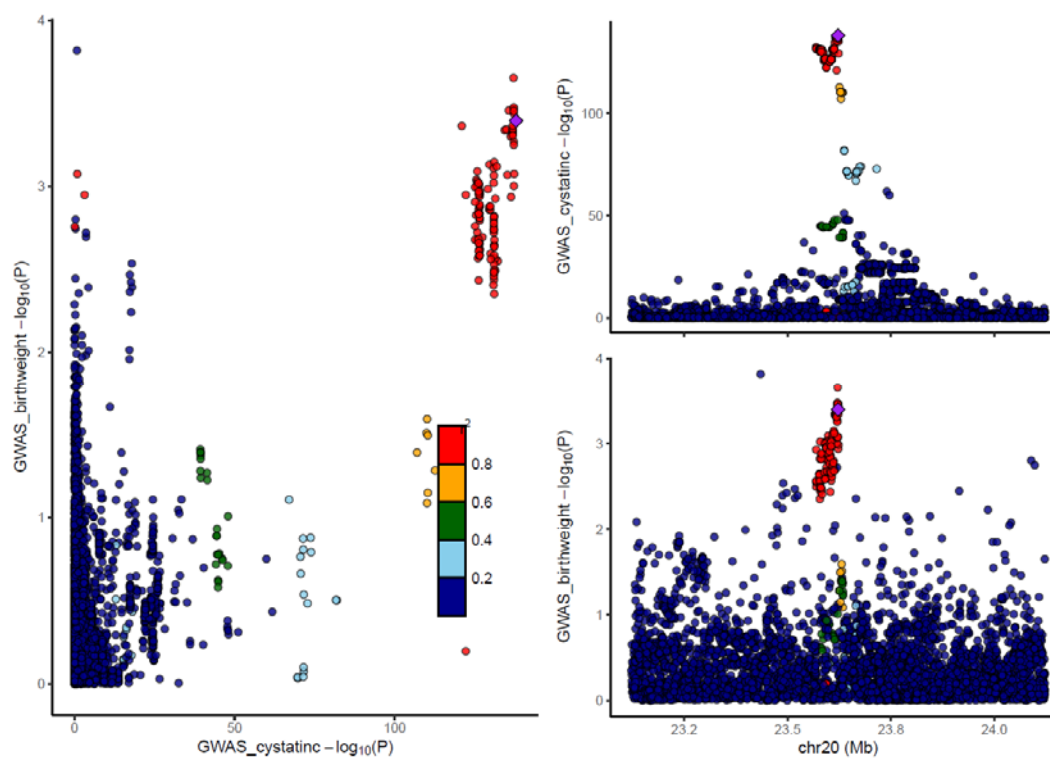

804

805 Supplementary figure 9 - Genetic associations with Cystatin\_c and offspring birth  
806 weight in offspring analysis. Each data point represents one genetic variant. The  
807 purple diamond represents the selected pQTL. Colours indicate the  $R^2$  values for  
808 strength of linkage disequilibrium between the genetic variant and the pQTL. In the  
809 left panel, the plot shows the correlation between log 10 p-values for the genetic  
810 association with protein levels (x axis) and birth weight (y axis). The right panels  
811 show recombination plots for the protein (top panel) and birth weight (bottom panel)  
812 with log10 p-values in the y axis and chromosome positions in the x axis.

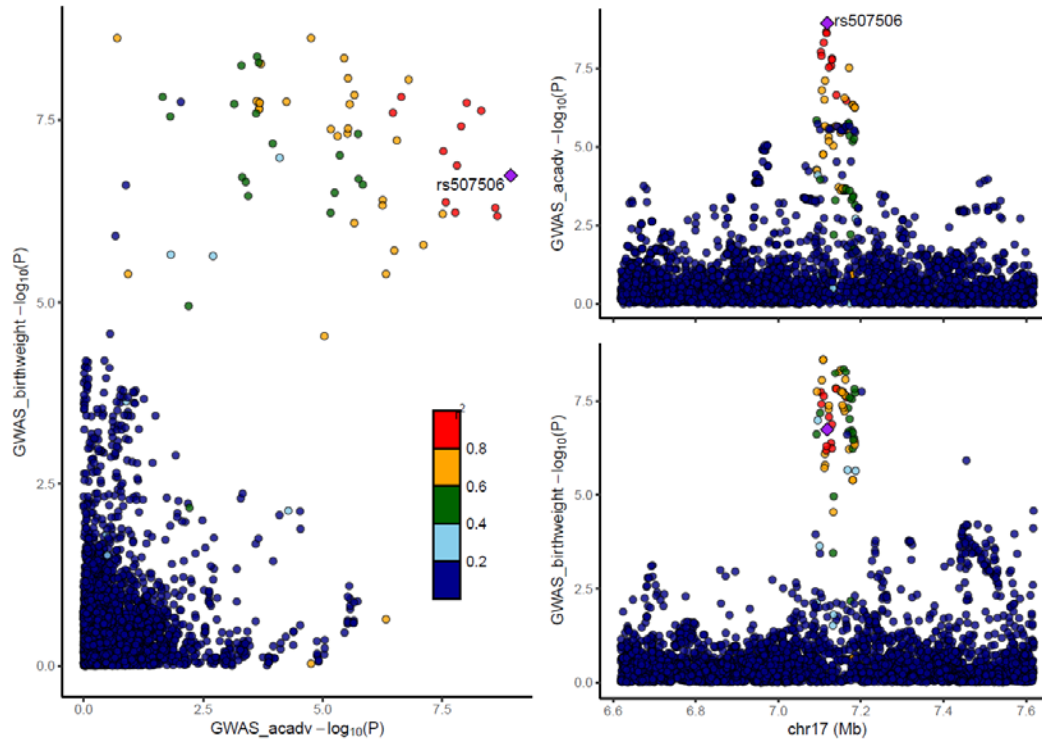

813

814 Supplementary figure 10 - Genetic associations with ACADV and offspring birth  
815 weight in offspring analysis. Each data point represents one genetic variant. The  
816 purple diamond represents the selected pQTL. Colours indicate the  $R^2$  values for  
817 strength of linkage disequilibrium between the genetic variant and the pQTL. In the  
818 left panel, the plot shows the correlation between log 10 p-values for the genetic  
819 association with protein levels (x axis) and birth weight (y axis). The right panels  
820 show recombination plots for the protein (top panel) and birth weight (bottom panel)  
821 with log10 p-values in the y axis and chromosome positions in the x axis.

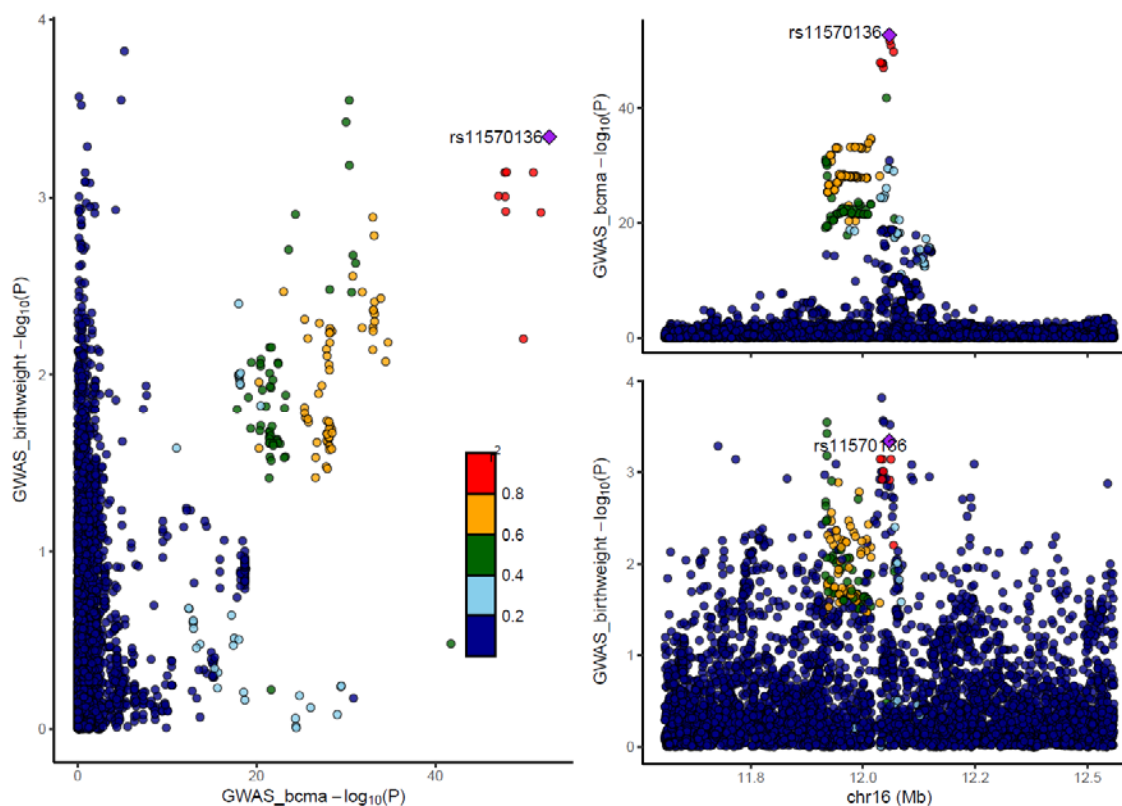

822

823 Supplementary figure 11 - Genetic associations with BCMA and offspring birth  
824 weight in offspring analysis. Each data point represents one genetic variant. The  
825 purple diamond represents the selected pQTL. Colours indicate the  $R^2$  values for  
826 strength of linkage disequilibrium between the genetic variant and the pQTL. In the  
827 left panel, the plot shows the correlation between  $\log_{10}$  p-values for the genetic  
828 association with protein levels (x axis) and birth weight (y axis). The right panels  
829 show recombination plots for the protein (top panel) and birth weight (bottom  
830 panel) with  $\log_{10}$  p-values in the y axis and chromosome positions in the x axis.



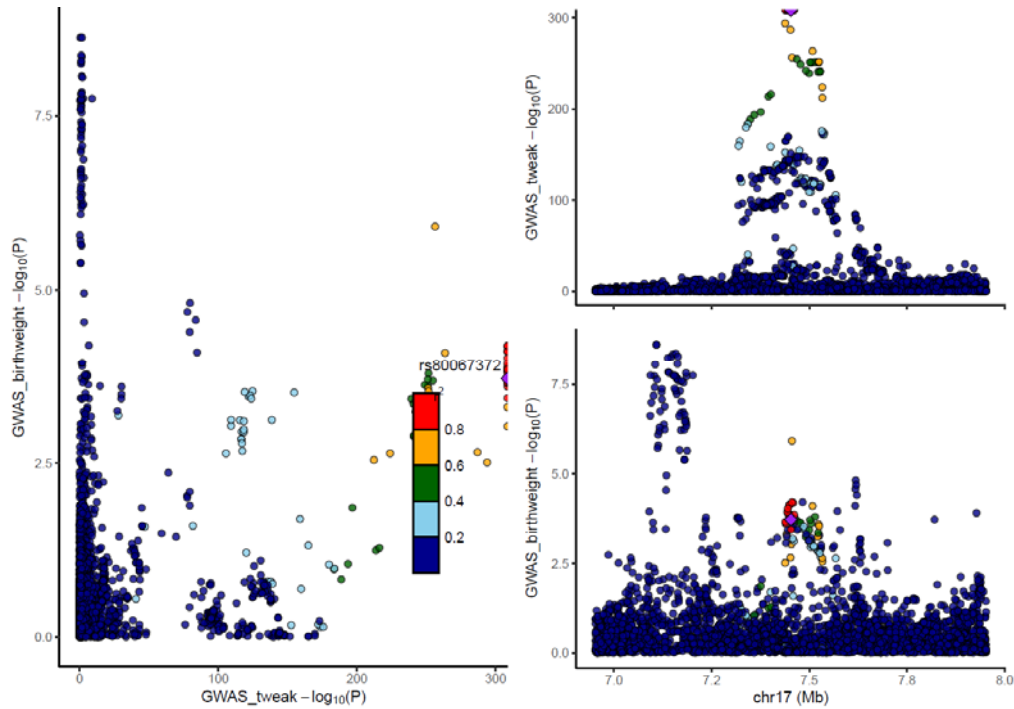

831

832 Supplementary figure 12 - Genetic associations with TWEAK and offspring birth  
833 weight in offspring analysis. Each data point represents one genetic variant. The  
834 purple diamond represents the selected pQTL. Colours indicate the R<sup>2</sup> values for  
835 strength of linkage disequilibrium between the genetic variant and the pQTL. In the  
836 left panel, the plot shows the correlation between log 10 p-values for the genetic  
837 association with protein levels (x axis) and birth weight (y axis). The right panels  
838 show recombination plots for the protein (top panel) and birth weight (bottom panel)  
839 with log10 p-values in the y axis and chromosome positions in the x axis.



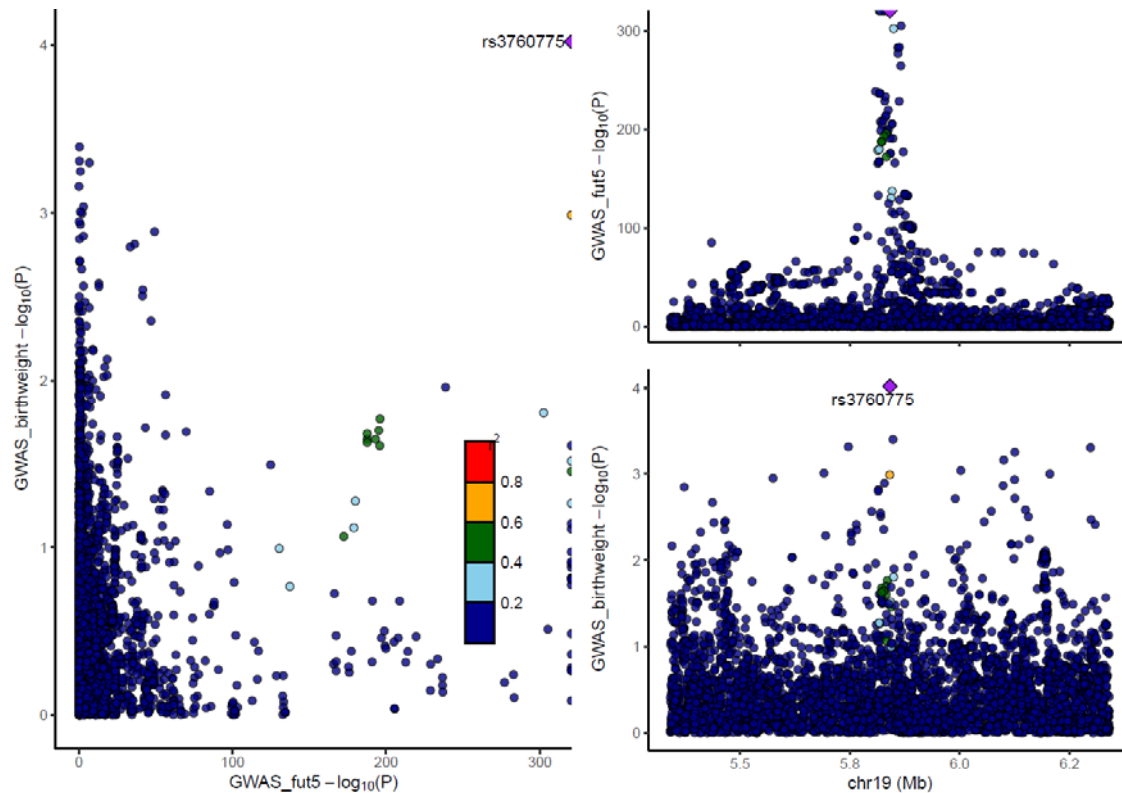

840

841 Supplementary figure 13 - Genetic associations with FUT5 and offspring birth weight  
842 in offspring analysis. Each data point represents one genetic variant. The purple  
843 diamond represents the selected pQTL. Colours indicate the  $R^2$  values for strength  
844 of linkage disequilibrium between the genetic variant and the pQTL. In the left panel,  
845 the plot shows the correlation between  $\log_{10}$  p-values for the genetic association  
846 with protein levels (x axis) and birth weight (y axis). The right panels show  
847 recombination plots for the protein (top panel) and birth weight (bottom panel) with  
848  $\log_{10}$  p-values in the y axis and chromosome positions in the x axis.

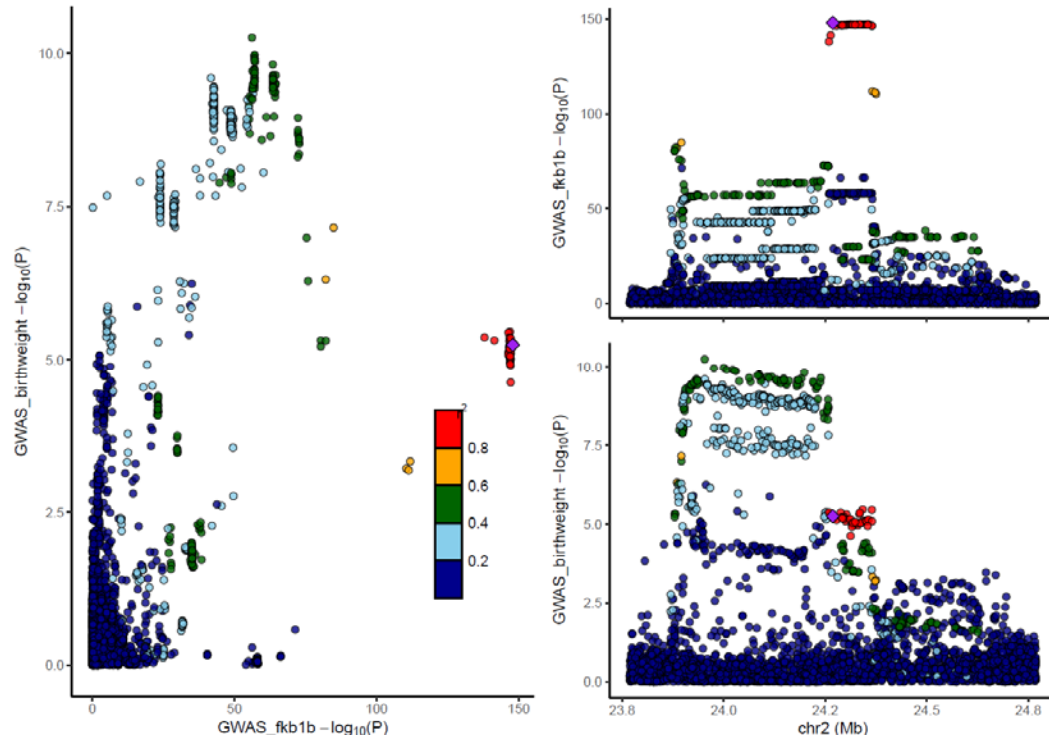

849

850 Supplementary figure 14 - Genetic associations with FKB1B and offspring birth  
851 weight in offspring analysis. Each data point represents one genetic variant. The  
852 purple diamond represents the selected pQTL. Colours indicate the R<sup>2</sup> values for  
853 strength of linkage disequilibrium between the genetic variant and the pQTL. In the  
854 left panel, the plot shows the correlation between log 10 p-values for the genetic  
855 association with protein levels (x axis) and birth weight (y axis). The right panels  
856 show recombination plots for the protein (top panel) and birth weight (bottom panel)  
857 with log10 p-values in the y axis and chromosome positions in the x axis.

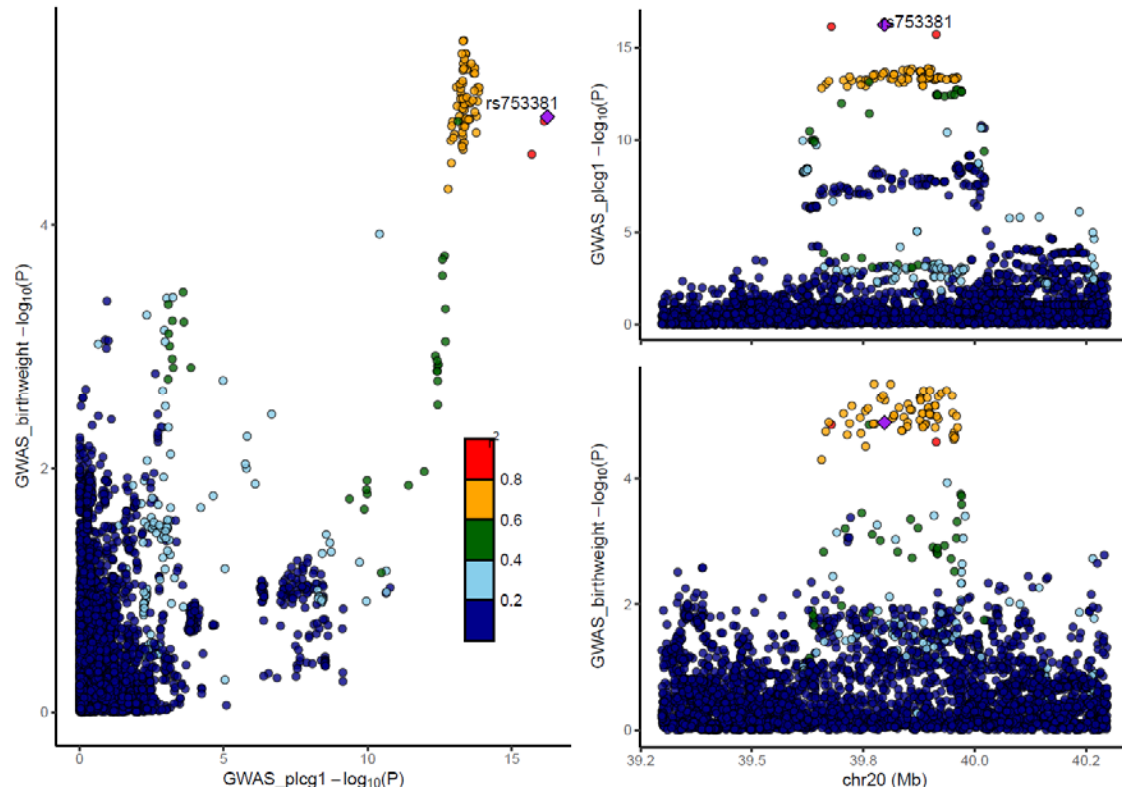

858

859 Supplementary figure 15 - Genetic associations with PLCG1 and offspring birth  
860 weight in offspring analysis. Each data point represents one genetic variant. The  
861 purple diamond represents the selected pQTL. Colours indicate the R<sup>2</sup> values for  
862 strength of linkage disequilibrium between the genetic variant and the pQTL. In the  
863 left panel, the plot shows the correlation between log 10 p-values for the genetic  
864 association with protein levels (x axis) and birth weight (y axis). The right panels  
865 show recombination plots for the protein (top panel) and birth weight (bottom panel)  
866 with log10 p-values in the y axis and chromosome positions in the x axis.

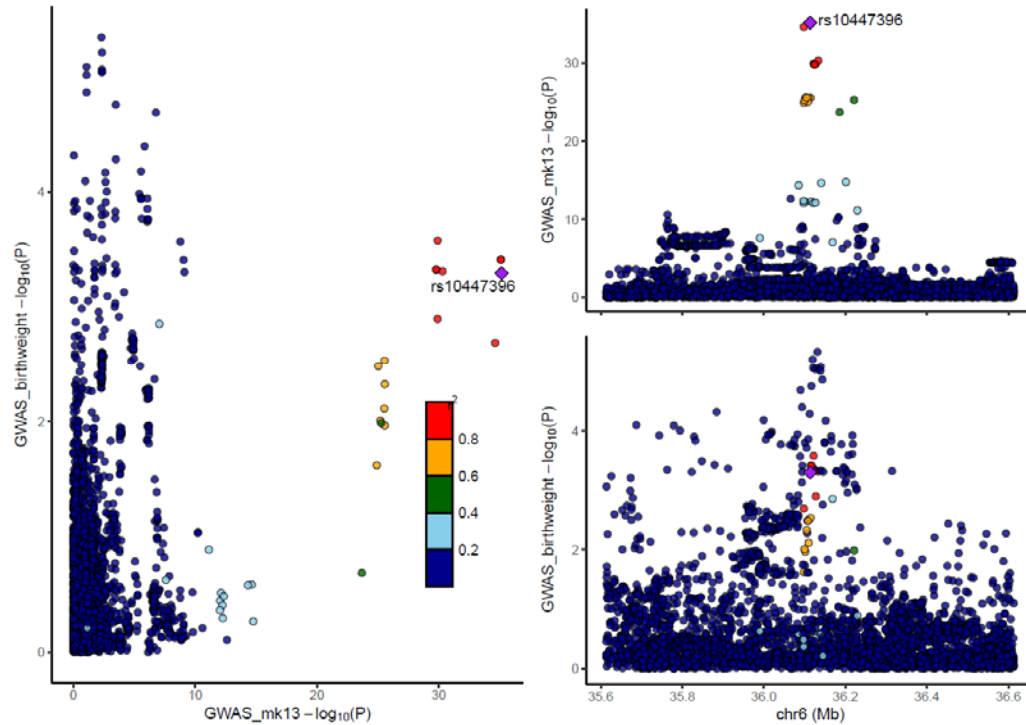

867

868 Supplementary figure 16 - Genetic associations with MK13 and offspring birth weight  
869 in offspring analysis. Each data point represents one genetic variant. The purple  
870 diamond represents the selected pQTL. Colours indicate the  $R^2$  values for strength  
871 of linkage disequilibrium between the genetic variant and the pQTL. In the left panel,  
872 the plot shows the correlation between  $\log_{10}$  p-values for the genetic association  
873 with protein levels (x axis) and birth weight (y axis). The right panels show  
874 recombination plots for the protein (top panel) and birth weight (bottom panel) with  
875  $\log_{10}$  p-values in the y axis and chromosome positions in the x axis.

876

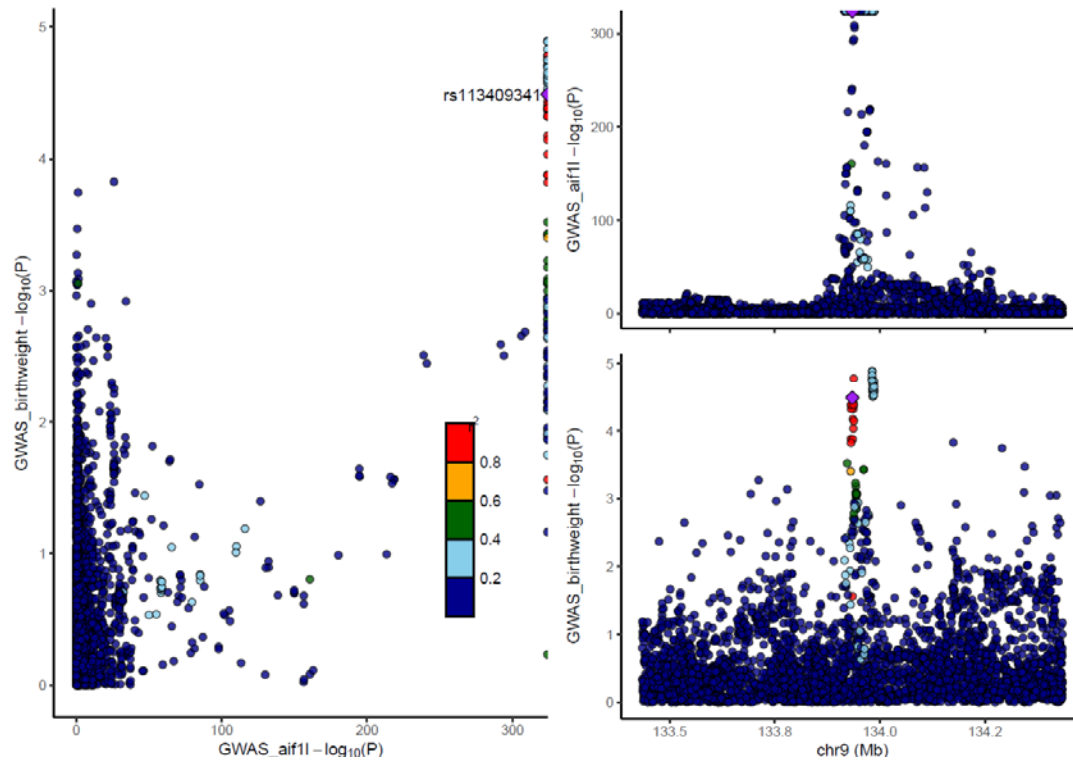

877

878 Supplementary figure 18 - Genetic associations with AIF1L and offspring birth weight  
879 in offspring analysis. Each data point represents one genetic variant. The purple  
880 diamond represents the selected pQTL. Colours indicate the  $R^2$  values for strength  
881 of linkage disequilibrium between the genetic variant and the pQTL. In the left panel,  
882 the plot shows the correlation between  $\log_{10}$  p-values for the genetic association  
883 with protein levels (x axis) and birth weight (y axis). The right panels show  
884 recombination plots for the protein (top panel) and birth weight (bottom panel) with  
885  $\log_{10}$  p-values in the y axis and chromosome positions in the x axis.

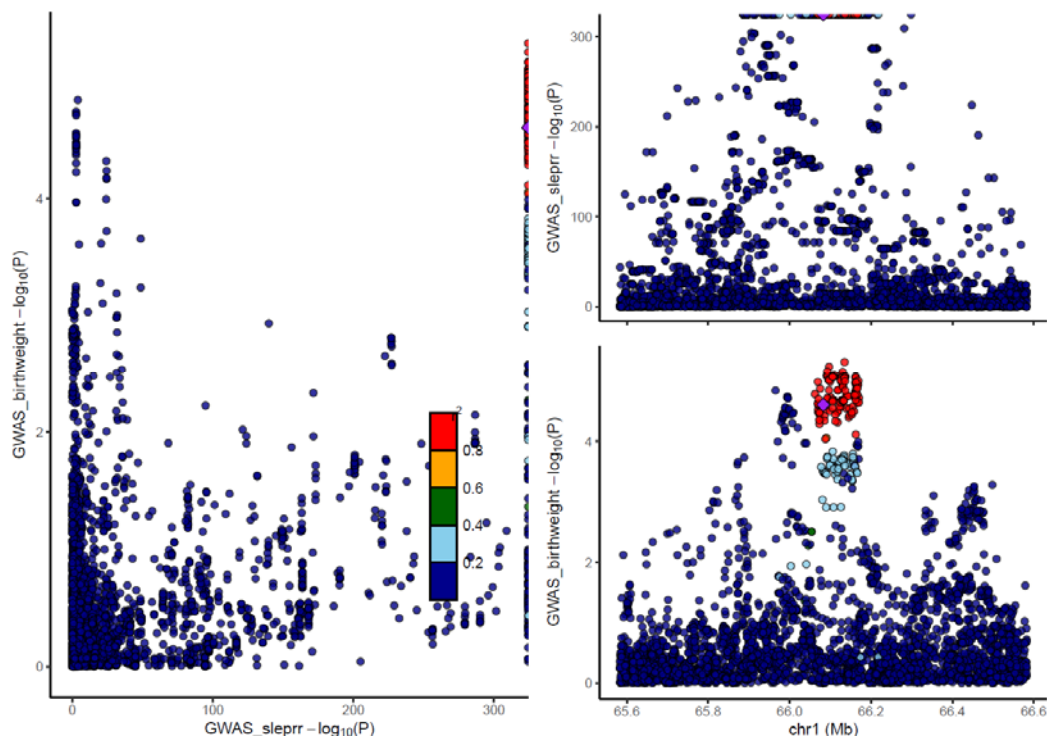

886

887 Supplementary figure 19 - Genetic associations with sLeptin\_R and offspring birth  
888 weight in offspring analysis. Each data point represents one genetic variant. The  
889 purple diamond represents the selected pQTL. Colours indicate the R<sup>2</sup> values for  
890 strength of linkage disequilibrium between the genetic variant and the pQTL. In the  
891 left panel, the plot shows the correlation between log 10 p-values for the genetic  
892 association with protein levels (x axis) and birth weight (y axis). The right panels  
893 show recombination plots for the protein (top panel) and birth weight (bottom panel)  
894 with log10 p-values in the y axis and chromosome positions in the x axis.

895

896

897

898

899

900

901

902

903

904

905

906

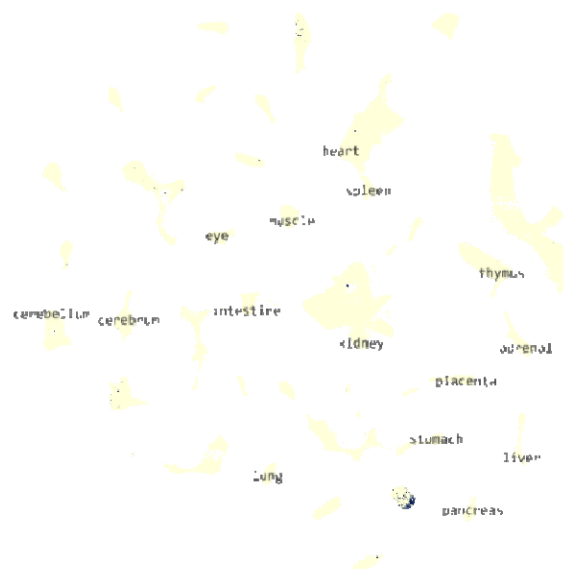

907

908 Supplementary figure 20 - Fetal single cell gene expression expressed in the  
909 pancreas for NEC1, where the organs are shown in yellow and the single cells  
910 demonstrating expression in navy blue.

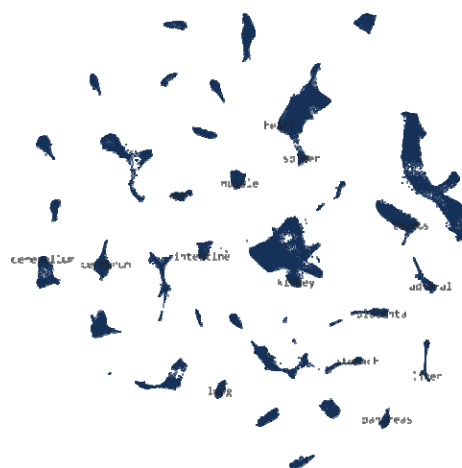

911

912 Supplementary figure 22 - Fetal single cell gene expression expressed tissue-wide  
913 for Galectin\_4, where the organs are shown in yellow and the single cells  
914 demonstrating expression in navy blue.

915



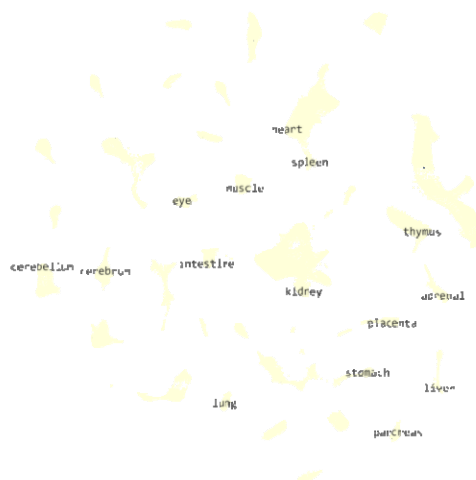

916

917 Supplementary figure 23 - Fetal single cell gene expression expressed tissue-wide  
918 for FUT5, where the organs are shown in yellow and the single cells demonstrating  
919 expression in navy blue.

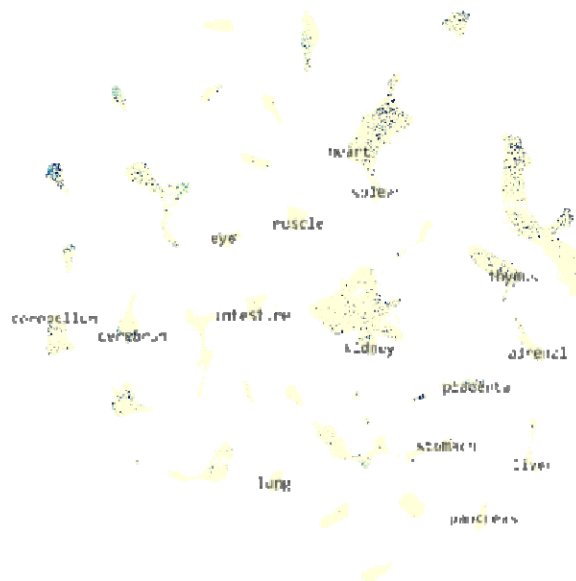

920

921 Supplementary figure 24 - Fetal single cell gene expression expressed tissue-wide  
922 for UBS3B, where the organs are shown in yellow and the single cells demonstrating  
923 expression in navy blue.

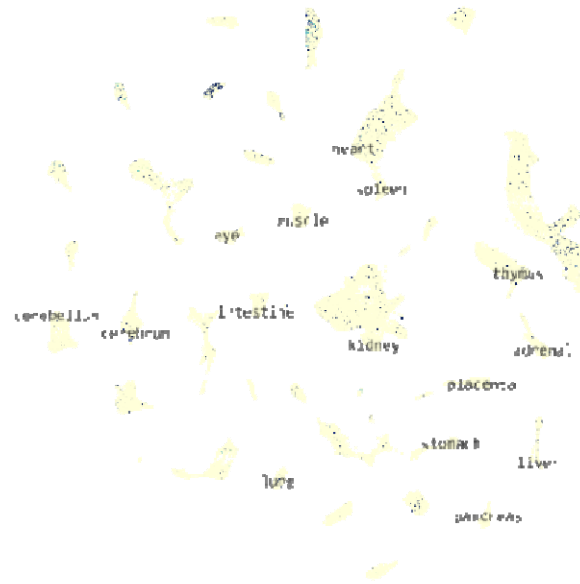

924

925 Supplementary figure 25 - Fetal single cell gene expression expressed tissue-wide  
926 for sLeptin\_R, where the organs are shown in yellow and the single cells  
927 demonstrating expression in navy blue.

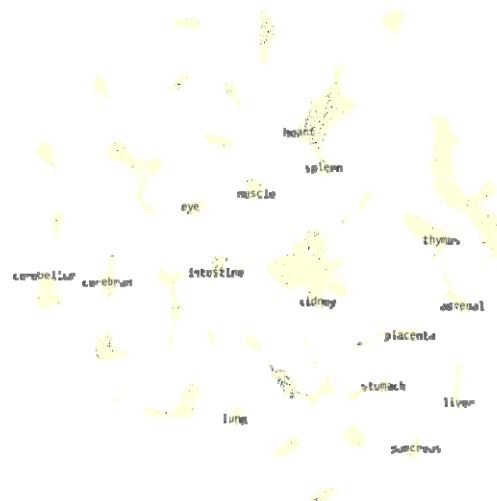

928

929 Supplementary figure 26 - Fetal single cell gene expression expressed tissue-wide  
930 for AIF1L, where the organs are shown in yellow and the single cells demonstrating  
931 expression in navy blue.

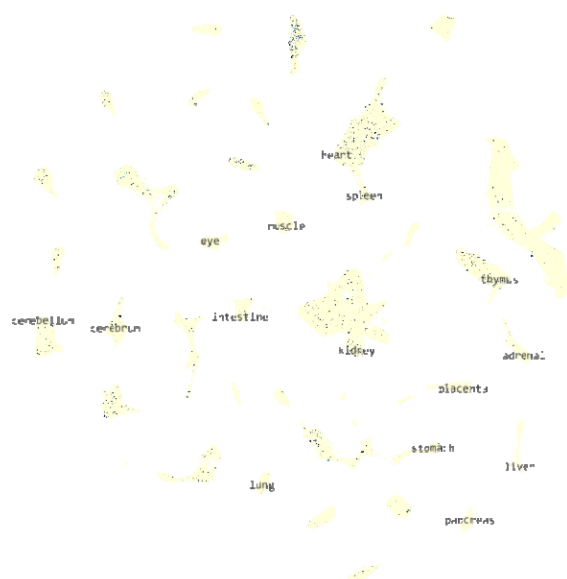

932

933 Supplementary figure 27 - Fetal single cell gene expression expressed tissue-wide  
934 for PLCG1, where the organs are shown in yellow and the single cells demonstrating  
935 expression in navy blue.

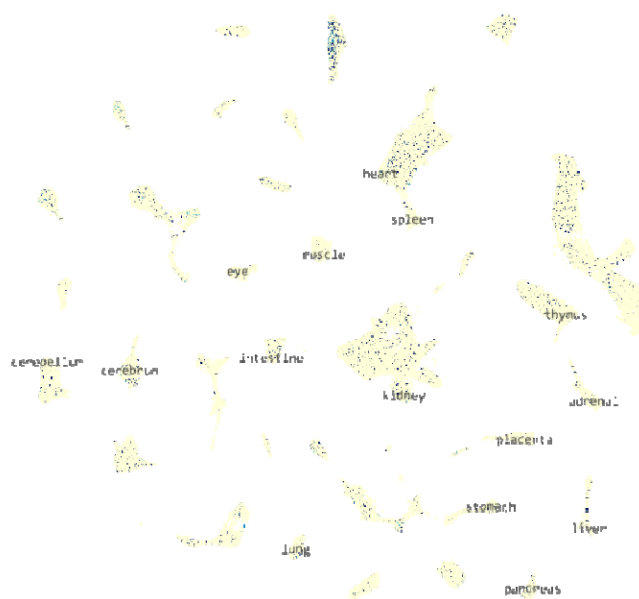

936

937 Supplementary figure 28 - Fetal single cell gene expression expressed tissue-wide  
938 for IFN\_a\_b\_R1, where the organs are shown in yellow and the single cells  
939 demonstrating expression in navy blue.

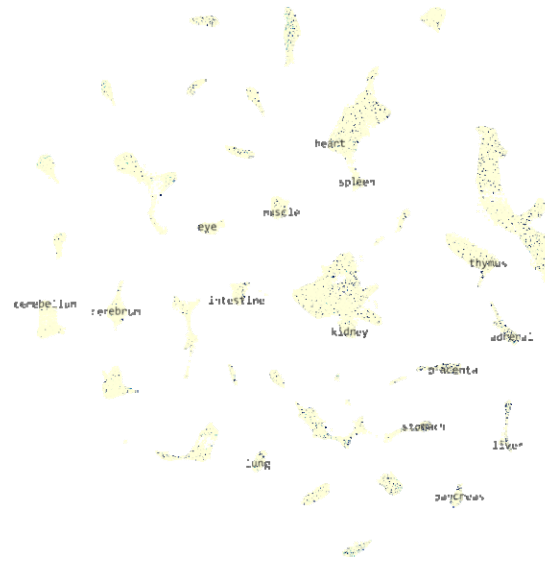

940

941 Supplementary figure 29 - Fetal single cell gene expression expressed tissue-wide  
942 for ACADV, where the organs are shown in yellow and the single cells demonstrating  
943 expression in navy blue.

944

945

946

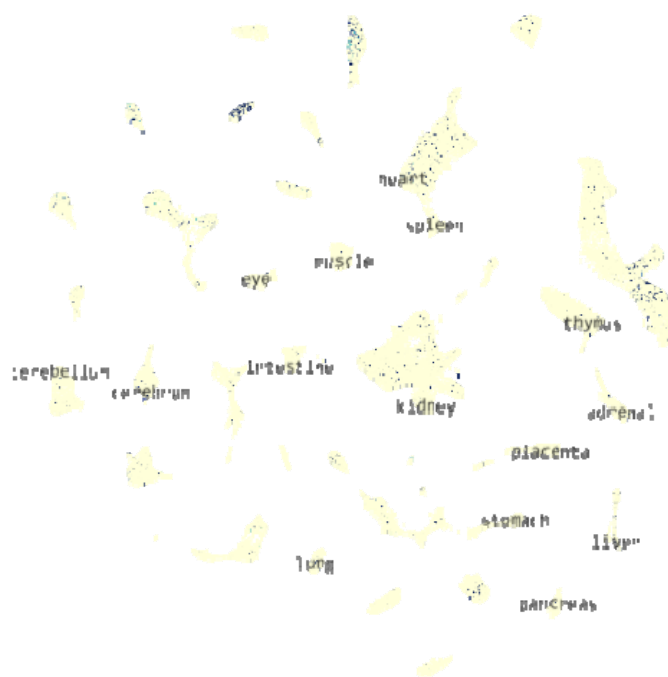

947

948 Supplementary figure 22 - Fetal single cell gene expression expressed tissue-wide  
949 for sLeptin\_R, where the organs are shown in yellow and the single cells  
950 demonstrating expression in navy blue.

951

952

953

954

955

956

957

958

959
